# Supplementary material
Source: PubMed Central journal article supplement (PMC9130711)
Supplement: mmc1.pdf [file mmc1.pdf]

**Supplemental information**

**Baricitinib attenuates the proinflammatory phase  
of COVID-19 driven by lung-infiltrating monocytes**

**Brian Dobosh, Keivan Zandi, Diego Moncada Giraldo, Shu Ling Goh, Kathryn Musall, Milagros Aldeco, Julia LeCher, Vincent D. Giacalone, Junkai Yang, Devon J. Eddins, Manoj Bhasin, Eliver Ghosn, Vikas Sukhatme, Raymond F. Schinazi, and Rabindra Tirouvanziam**

A

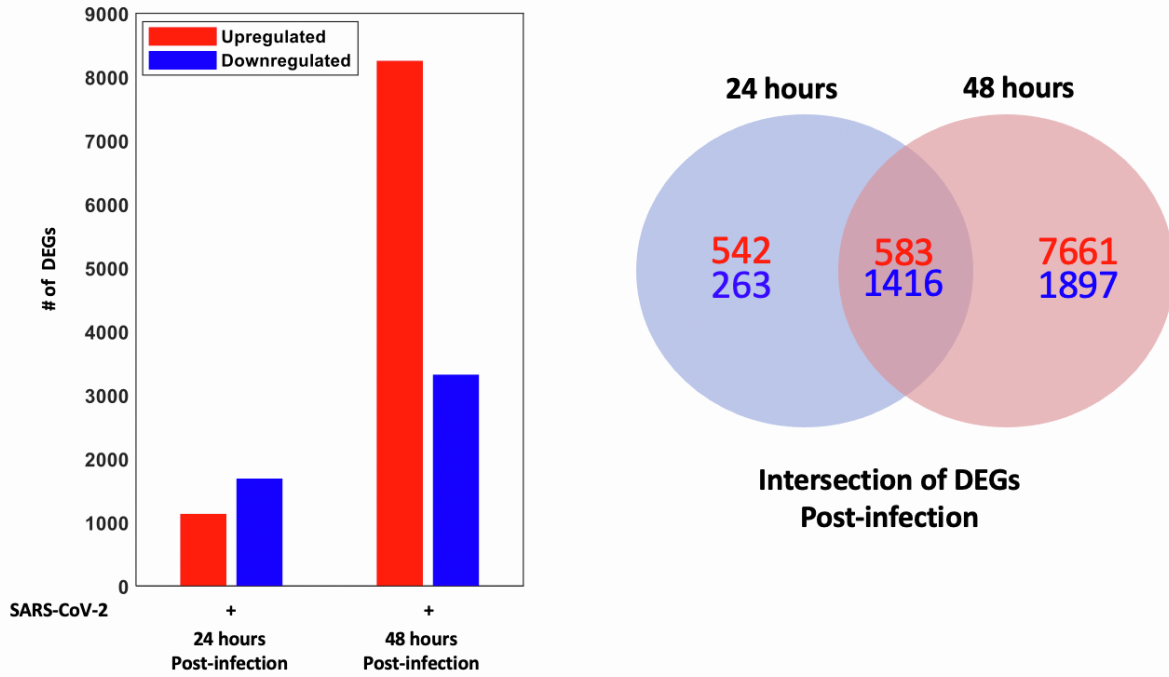

B

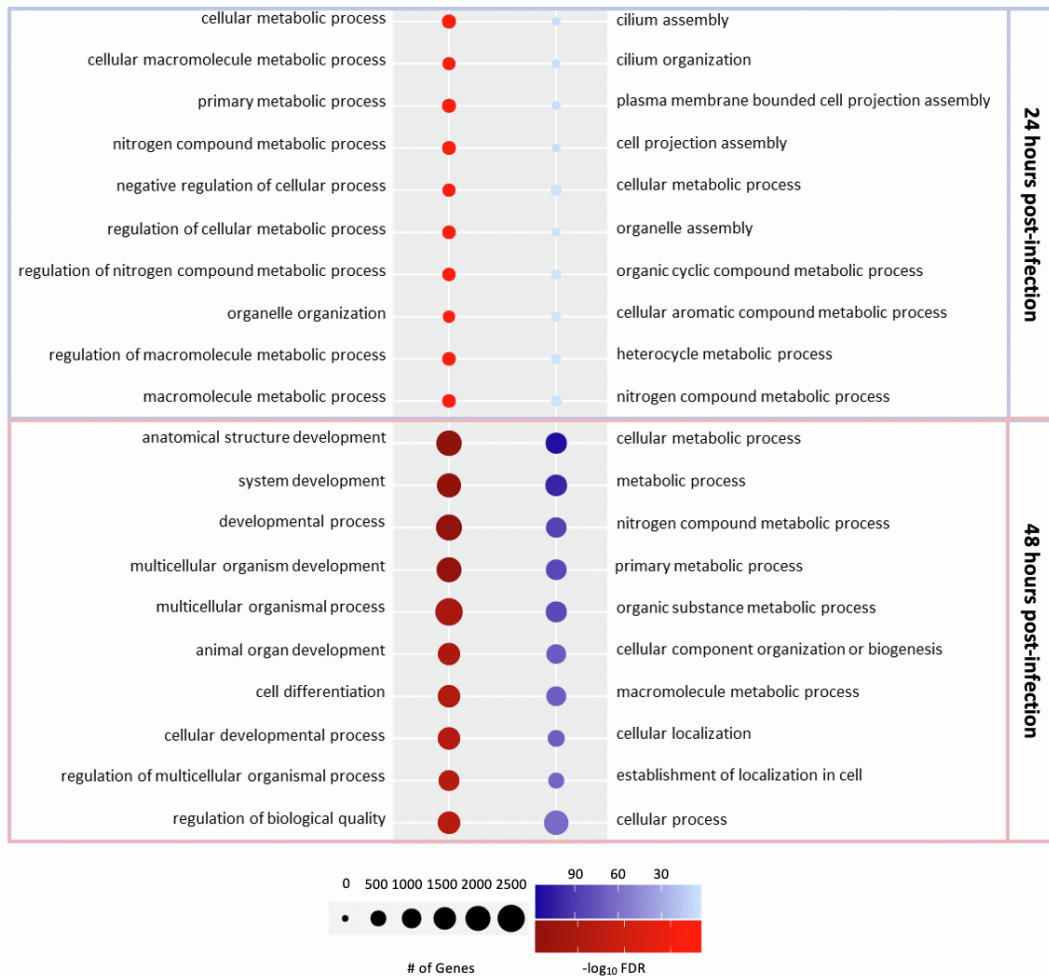

**Supplementary Figure 1. Related to Figure 2. (A)** Number of upregulated and downregulated DEGs from the RNA-seq data (n=3 biological replicates) of HLE-ALI cells infected with SARS-CoV-2 for either 24 or 48 hrs. **(B)** GO processes enriched in HLE-ALI cells at either 24 or 48 hrs post-infection with SARS-CoV-2. GO terms were generated using uniquely DEGs between the two conditions.

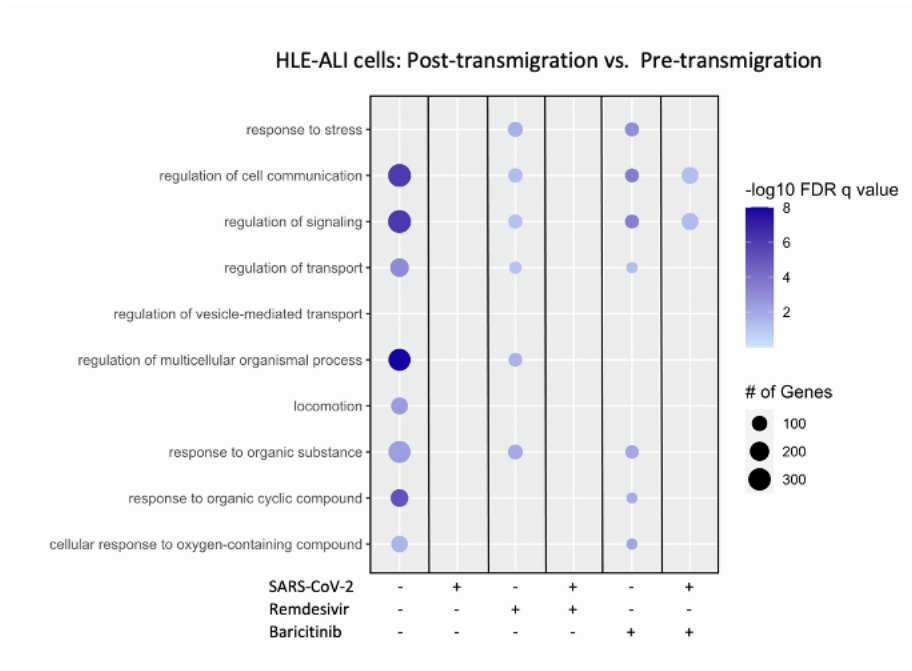

**Supplementary Figure 2. Related to Figure 3.** Enriched GO terms related to HLE-ALI cells pre- and post- transmigration under each drug and infection condition (n=3 biological replicates).

A

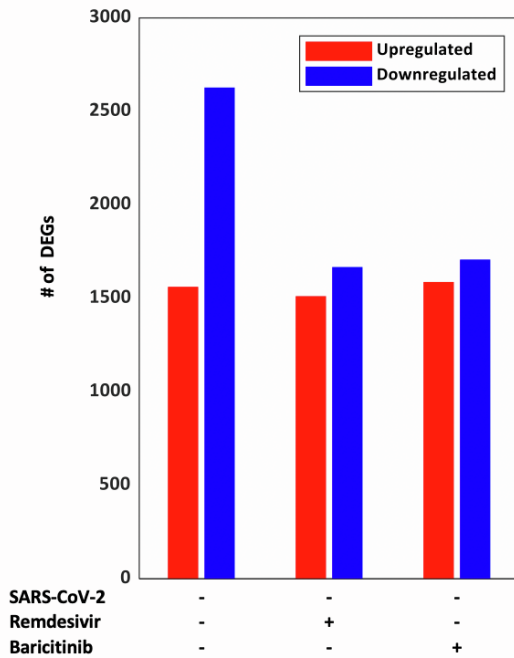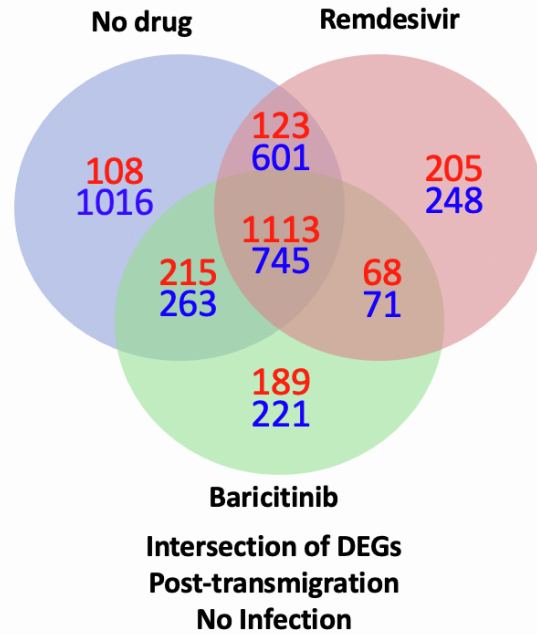

B

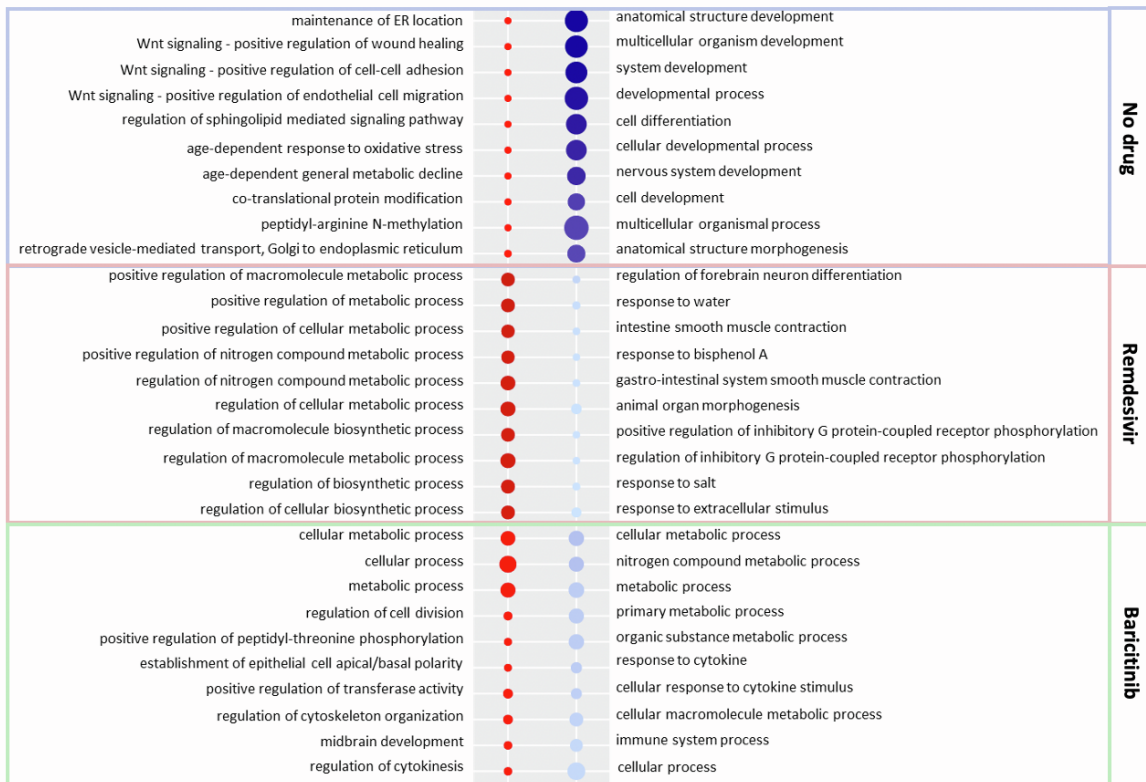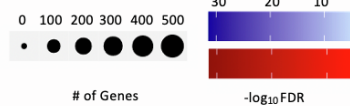

**Supplementary Figure 3. Related to Figure 3. (A)** Number of upregulated and downregulated DEGs in the RNA-seq data obtained from uninfected HLE-ALI cells after transmigration of monocytes in the presence of either vehicle, remdesivir, or baricitinib (n=3 biological replicates). **(B)** GO processes enriched in uninfected HLE-ALI cells after transmigration of monocytes in the presence of either vehicle, remdesivir, or baricitinib. GO terms were generated using uniquely DEGs between the three conditions.

A

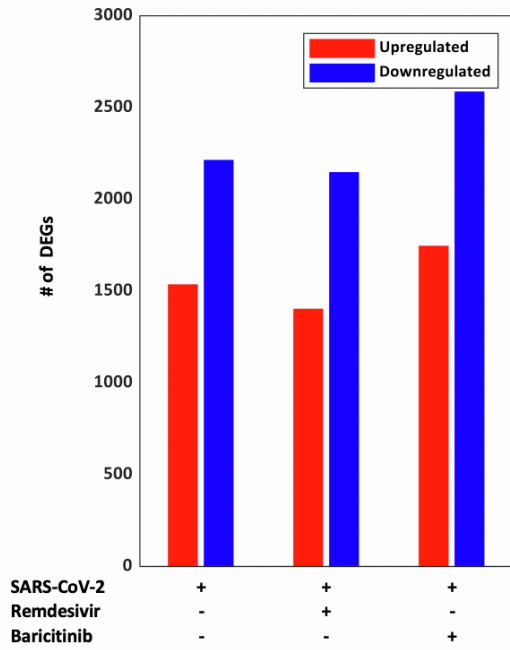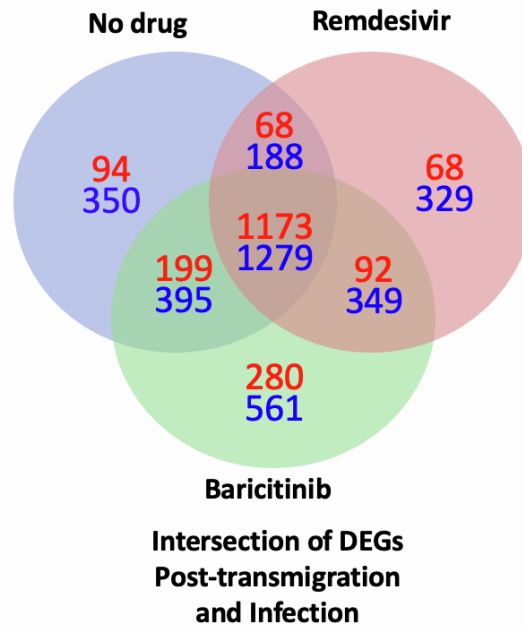

B

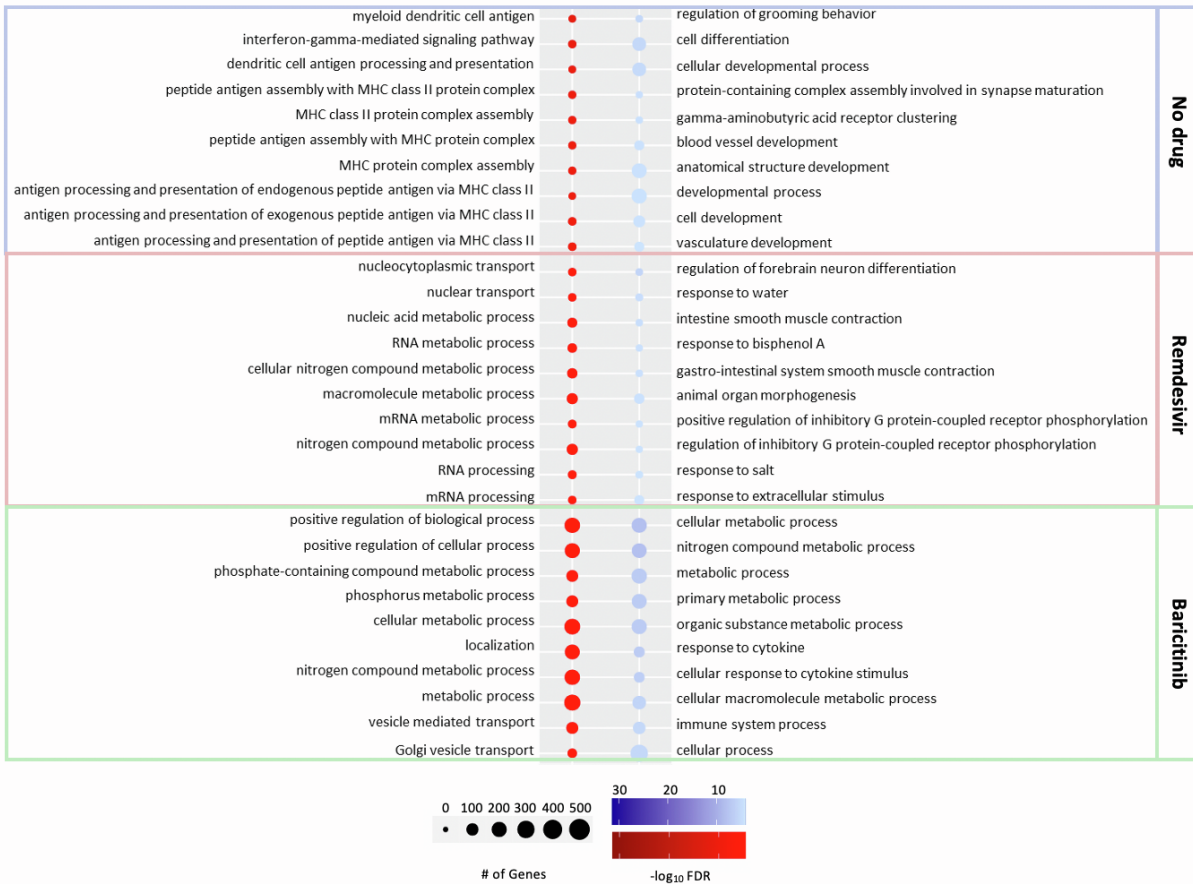

**Supplementary Figure 4. Related to Figure 3.**(A) Number of upregulated and downregulated DEGs in the RNA-seq data obtained from SARS-CoV-2-infected HLE-ALI cells after transmigration of monocytes in the presence of either vehicle, remdesivir, or baricitinib (n=3 biological replicates). (B) GO processes enriched in SARS-CoV-2-infected HLE-ALI cells after transmigration of monocytes in the presence of either vehicle, remdesivir, or baricitinib. GO terms were generated using uniquely DEGs between the three conditions.



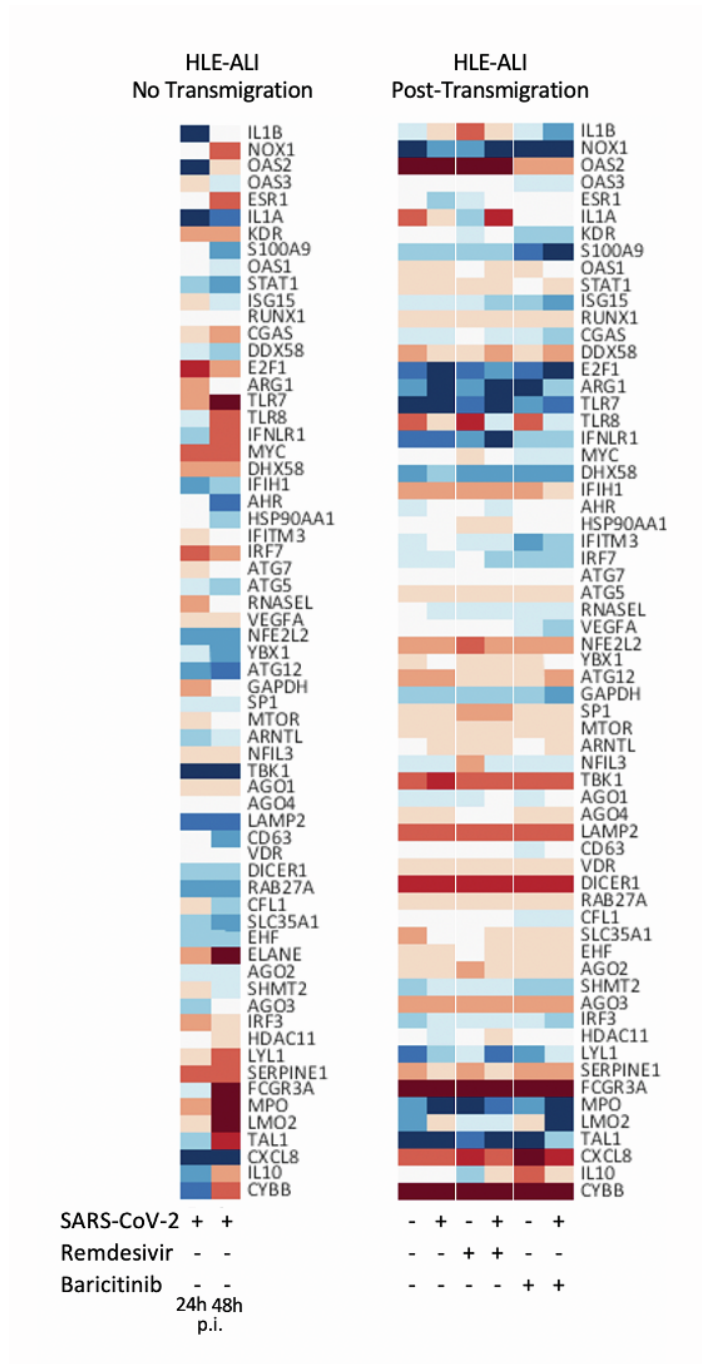

**Supplementary Figure 5. Related to Figure 3.** Normalized expression values of a set of genes extracted from the RNA-seq data of HLE-ALI cells under each treatment condition (n=3 biological replicates). The set of genes was selected to be the same as the genes selected for qRT-PCR of the monocytes in **Figure 3B**. If a gene was not identified in the RNA-seq data of HLE-ALI cells, it was not listed here.

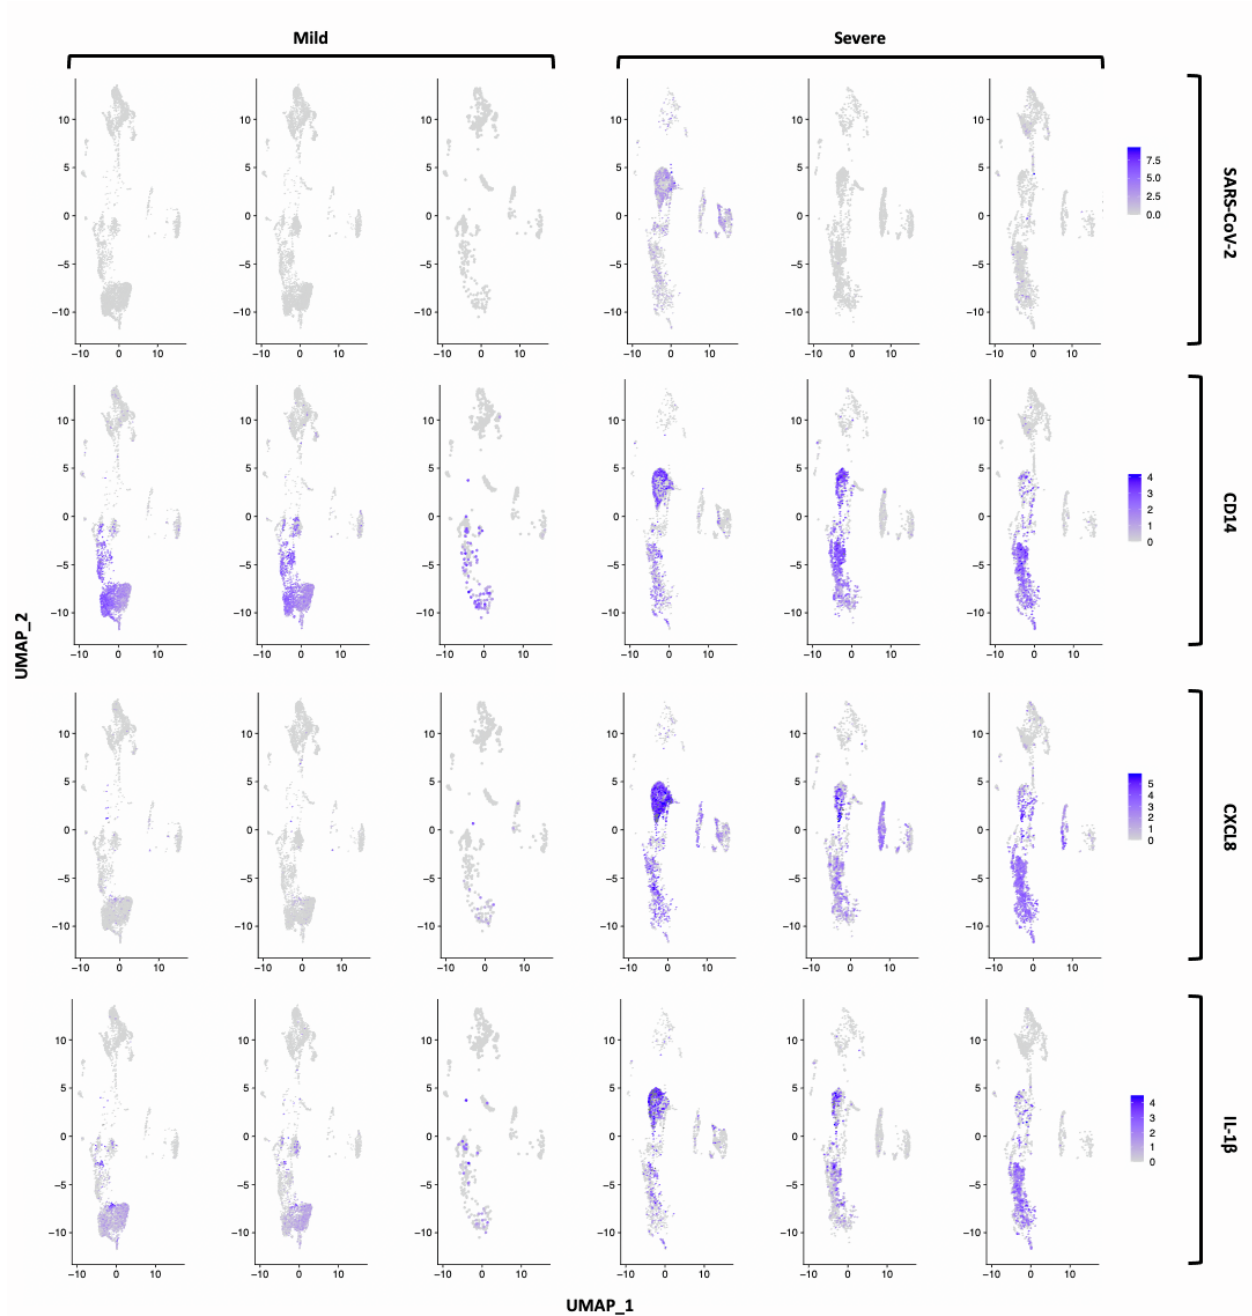

**Supplementary Figure 6. Related to Figure 4.** Individual UMAPs of scRNA-seq data of BALF from six patients hospitalized with either mild (n=3) or severe (n=3) COVID-19. Original scRNA-seq data is publicly available under accession code GSE145926 (Liao et al., 2020).

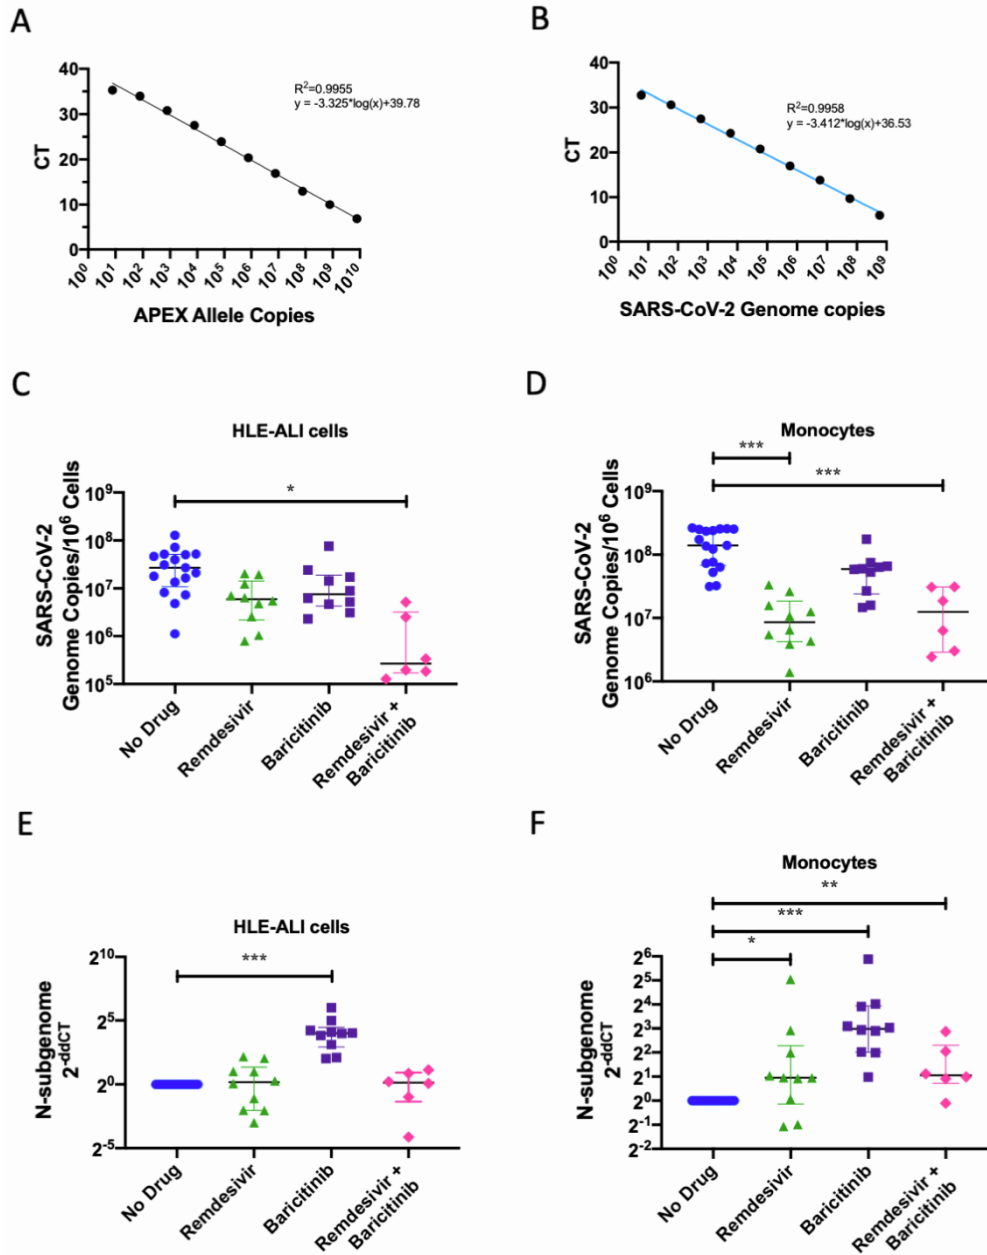

**Supplementary Figure 7. Related to Figure 5. SARS-CoV-2 genome copies in each compartment relative to cell number and N-subgenome calculations. (A)** In order to calculate cell number a standard curve was used to estimate the number of alleles of APEX present (see Supplementary Tables 9 and 10). This number was transformed by the following calculation to obtain an estimate for cell number: (calculated gene copies) /  $2^{\text{dilution factor}}$  (B) A standard curve was generated to calculate the total number of SARS-CoV-2 genome copies

**(see Supplementary Tables 9 and 10).** **(C, D)** Calculated SARS-CoV-2 genome copies in each cell was normalized by dividing by the number of cells present. **(E)** Primers aligning to the N-subgenome were used to quantify the replication competency of the virus. Data were normalized using the delta delta Ct method to 18S rRNA **(see Supplementary Tables 9 and 10)** (n=17 for the no drug condition, n=10 for the baricitinib and remdesivir alone conditions, and n=6 for the combined baricitinib and remdesivir conditions). All statistics were calculated using the Mann-Whitney U-test in Prism. \* p<0.05, \*\* p<0.01, \*\*\*p<0.001.

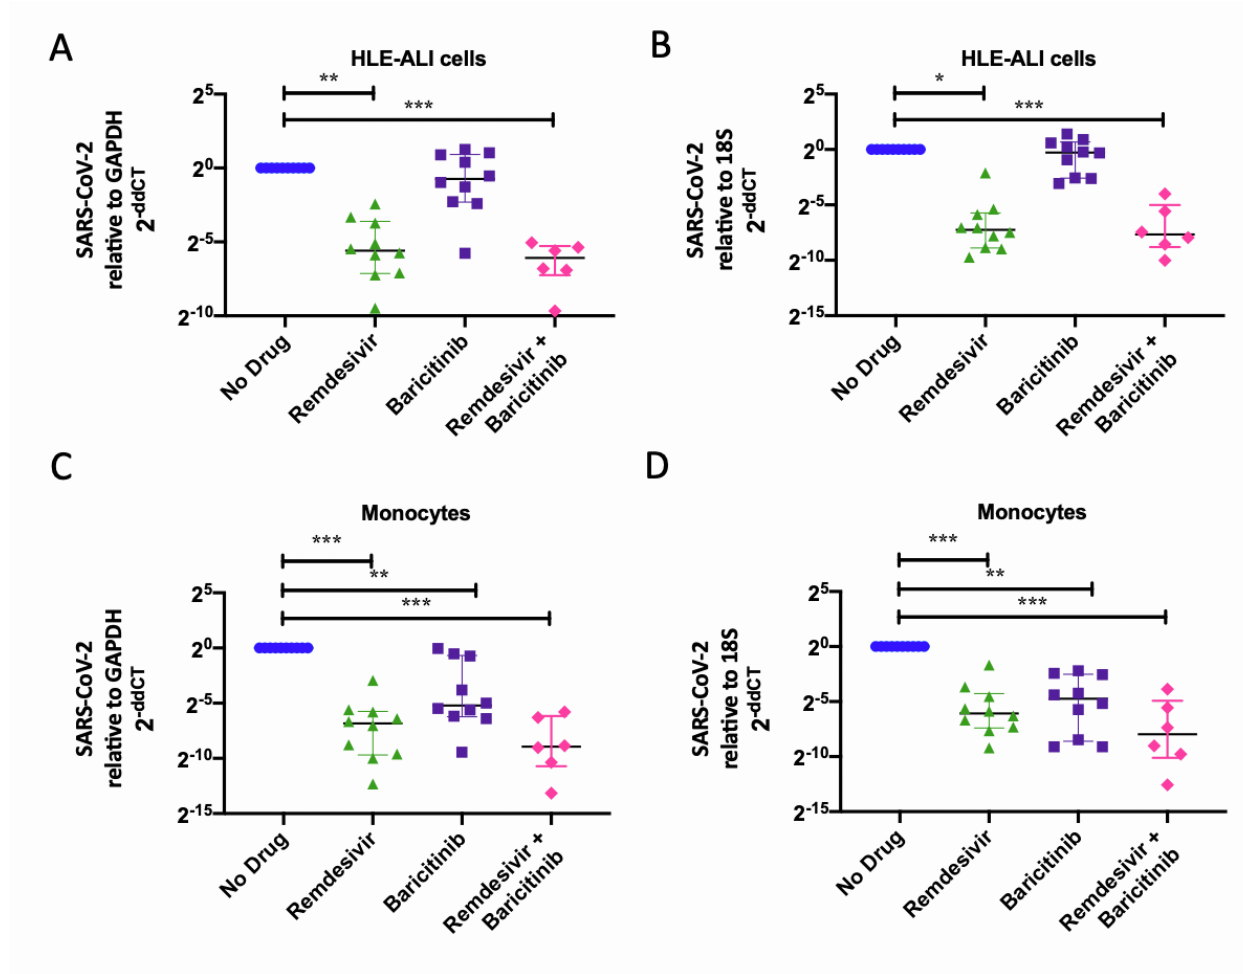

**Supplementary Figure 8. Related to Figure 5. (A-D)** Calculated SARS-CoV-2 genome copies in each condition was normalized to either GAPDH (A, C) or 18S rRNA (B, D) in HLE-ALI cells (A, B) or monocytes (C, D) using the delta delta Ct method (see Supplementary Tables 9 and 10) (n=10 for the no drug condition and the baricitinib and remdesivir alone conditions, and n=6 for the combined baricitinib and remdesivir conditions). All statistics were calculated using the Mann-Whitney U-test in Prism. \* p<0.05, \*\* p<0.01, \*\*\*p<0.001.

**A**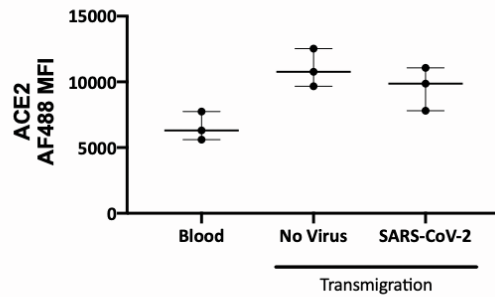**B**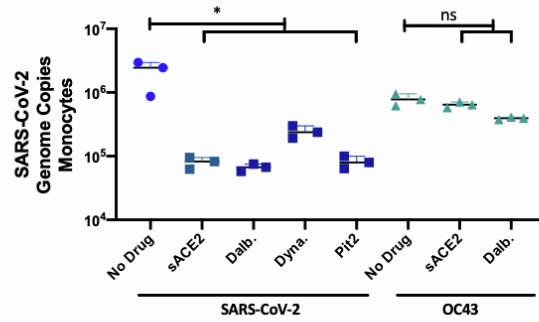

**Supplementary Figure 9. Related to Figure 5. (A)** Purified blood monocytes before and after transmigration across HLE-ALI cells with or without infection with SARS-CoV-2 were stained for the presence of surface ACE2 and then analyzed by flow cytometry (n=3 biological replicates). **(B)** Monocytes were transmigrated across HLE-ALI cells infected with either SARS-CoV-2 or OC43. In the apical fluid were soluble ACE2 (200 µg/mL), dalbavancin (1 µM), dynasore (80 µM) or pitstop2 (15 µM) (n=3 biological replicates). Statistics were calculated using a Mann-Whitney U-test in Prism. \* p<0.05, \*\* p<0.01, \*\*\*p<0.001.

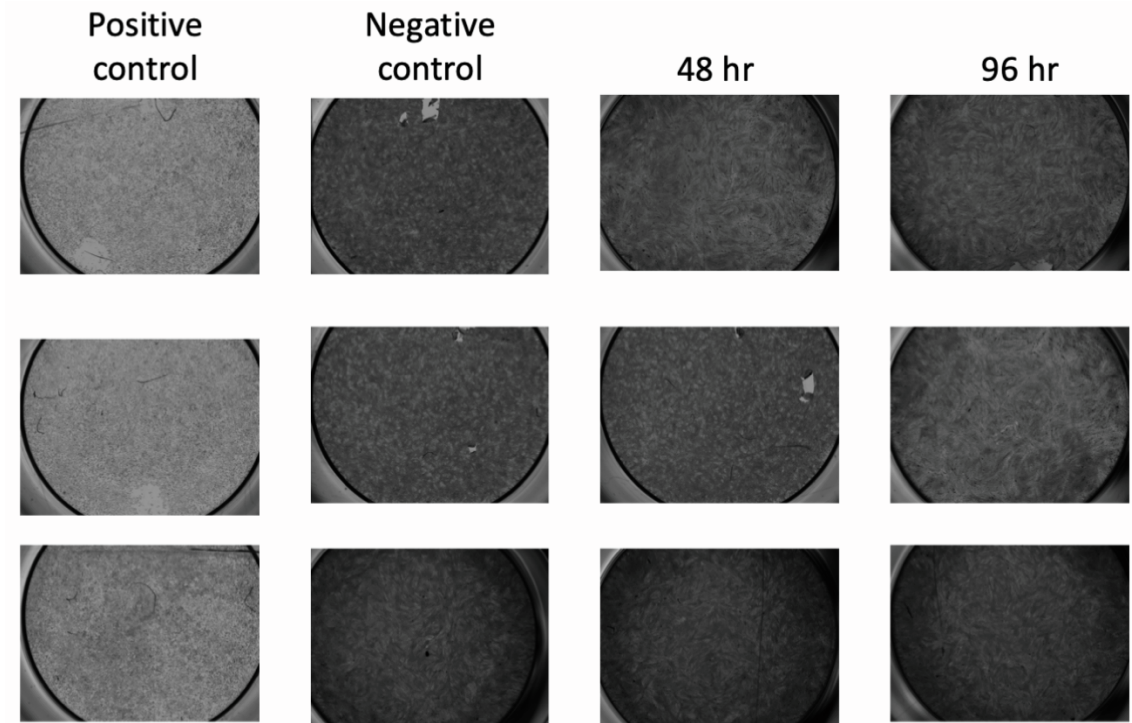

**Supplementary Figure 10. Related to Figure 6.** Extracellular fluid from cultures of SARS-CoV-2 infected transmigrated monocytes was layered onto VeroE6 cells to perform a plaque assay. The positive control was the direct application of  $2.5 \times 10^4$  genome copies of SARS-CoV-2 to the cells.

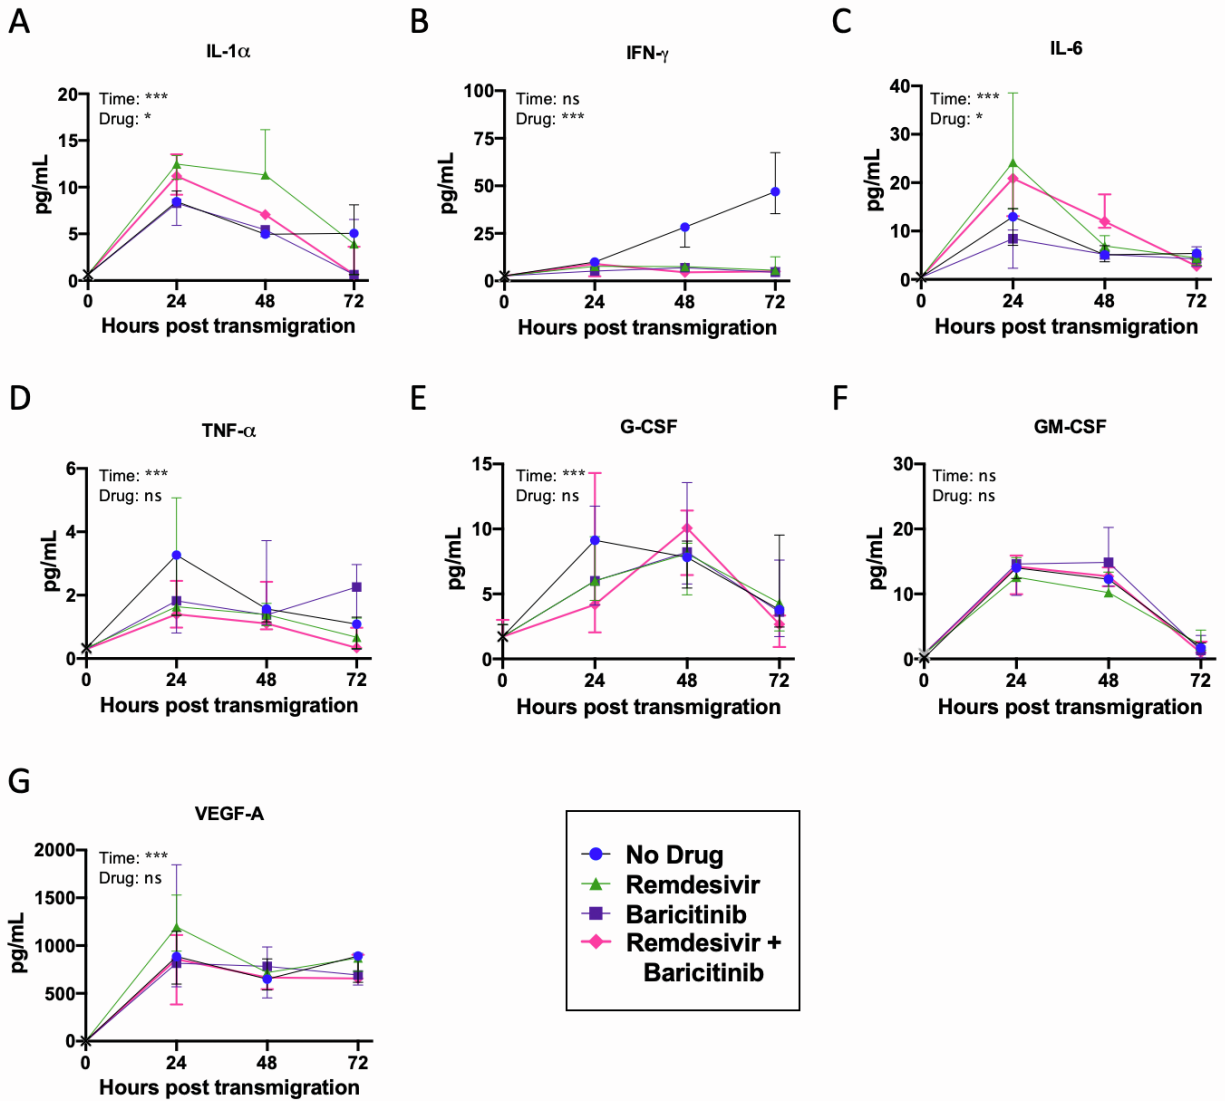

**Supplementary Figure 11. Related to Figure 6.** Inflammatory mediators from each of the monocyte treatment conditions were quantified using an electrochemiluminescent assay from n=3 biological replicates. All statistics were calculated with a two-way ANOVA, main effects model in Prism with Geisser-Greenhouse correction applied. \* p<0.05, \*\* p<0.01, \*\*\*p<0.001. Shown are median and interquartile range.
