# Supplementary material
Source: PubMed Central journal article supplement (PMC9130711)
Supplement: mmc12.pdf [file mmc12.pdf]

# Baricitinib attenuates the proinflammatory phase of COVID-19 driven by lung-infiltrating monocytes

## Graphical abstract

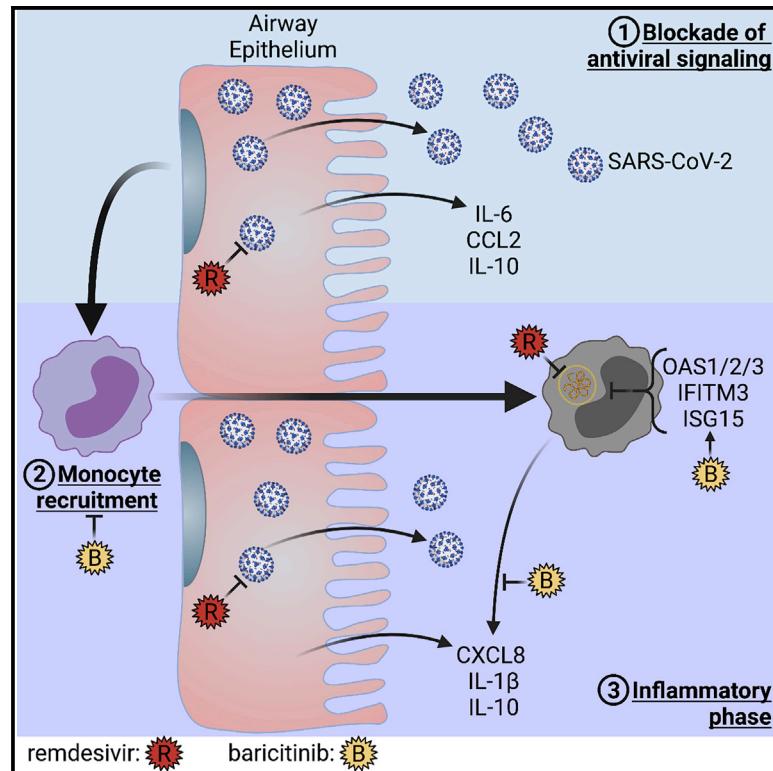

## Authors

Brian Dobosh, Keivan Zandi, Diego Moncada Giraldo, ..., Vikas Sukhatme, Raymond F. Schinazi, Rabindra Tirouvanziam

## Correspondence

tirouvanziam@emory.edu

## In brief

Dobosh et al. recapitulate infection by SARS-CoV-2 and subsequent inflammation by blood monocytes entering the lung in a human small airway model. Lung-recruited monocytes acquire SARS-CoV-2 from the infected epithelium but are unable to propagate virus. The immunomodulatory drug baricitinib promotes antiviral signaling in monocytes, which enhances clearance of SARS-CoV-2.

## Highlights

- A small airway model mimics infection with SARS-CoV-2
- Primary blood monocytes can transmigrate across infected epithelium acquiring virus
- Baricitinib promotes antiviral signaling in transmigrating monocytes
- Monocytes contain and release replication-incompetent SARS-CoV-2

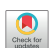

## Article

# Baricitinib attenuates the proinflammatory phase of COVID-19 driven by lung-infiltrating monocytes

Brian Dobosh,<sup>1,2,7</sup> Keivan Zandi,<sup>3,7</sup> Diego Moncada Giraldo,<sup>1,2</sup> Shu Ling Goh,<sup>3</sup> Kathryn Musall,<sup>3</sup> Milagros Aldeco,<sup>1,2</sup> Julia LeCher,<sup>3</sup> Vincent D. Giacalone,<sup>1,2</sup> Junkai Yang,<sup>4</sup> Devon J. Eddins,<sup>4</sup> Manoj Bhasin,<sup>5</sup> Eliver Ghosn,<sup>4</sup> Vikas Sukhatme,<sup>6</sup> Raymond F. Schinazi,<sup>3,8</sup> and Rabindra Tirouvanziam<sup>1,2,8,9,\*</sup>

<sup>1</sup>Department of Pediatrics, Emory University School of Medicine, Atlanta, GA, USA

<sup>2</sup>Center for CF and Airways Disease Research, Children's Healthcare of Atlanta, Atlanta, GA, USA

<sup>3</sup>Laboratory of Biochemical Pharmacology, Department of Pediatrics, Emory University School of Medicine and Children's Healthcare of Atlanta, Atlanta, GA, USA

<sup>4</sup>Lowance Center for Human Immunology, Department of Medicine, Emory University School of Medicine, Atlanta, GA, USA

<sup>5</sup>Department of Pediatrics and Department of Biomedical Bioinformatics, Emory University School of Medicine, Atlanta, GA, USA

<sup>6</sup>Department of Medicine and the Morningside Center for Innovative and Affordable Medicine, Emory University School of Medicine, Atlanta, GA, USA

<sup>7</sup>These authors contributed equally

<sup>8</sup>Senior author

<sup>9</sup>Lead contact

\*Correspondence: [tirouvanziam@emory.edu](mailto:tirouvanziam@emory.edu)  
<https://doi.org/10.1016/j.celrep.2022.110945>

## SUMMARY

SARS-CoV-2-infected subjects are generally asymptomatic during initial viral replication but may suffer severe immunopathology after the virus has receded and monocytes have infiltrated the airways. In bronchoalveolar lavage fluid from severe COVID-19 patients, monocytes express mRNA encoding inflammatory mediators and contain SARS-CoV-2 transcripts. We leverage a human small airway model of infection and inflammation, whereby primary blood monocytes transmigrate across SARS-CoV-2-infected lung epithelium to characterize viral burden, gene expression, and inflammatory mediator secretion by epithelial cells and monocytes. In this model, lung-infiltrating monocytes acquire SARS-CoV-2 from the epithelium and upregulate expression and secretion of inflammatory mediators, mirroring *in vivo* data. Combined use of baricitinib (Janus kinase inhibitor) and remdesivir (nucleoside analog) enhances antiviral signaling and viral clearance by SARS-CoV-2-positive monocytes while decreasing secretion of pronutrophilic mediators associated with acute respiratory distress syndrome. These findings highlight the role of lung-infiltrating monocytes in COVID-19 pathogenesis and their importance as a therapeutic target.

## INTRODUCTION

Coronavirus disease 2019 (COVID-19) continues to be a rapidly evolving pandemic caused by the lung-tropic severe acute respiratory syndrome coronavirus-2 (SARS-CoV-2) (Weston and Frieman, 2020). COVID-19 symptoms range from asymptomatic to mild to severe, and the course of lung disease can be broadly categorized into three phases (Blanco-Melo et al., 2020). In the first phase of immune avoidance, the virus infects epithelial cells and replicates rapidly for about 3–6 days while avoiding activation of canonical antiviral responses like type I interferon (IFN) (Acharya et al., 2020; Tay et al., 2020). Respiratory symptoms occur in those patients who may progress to a second phase of “cytokine release syndrome (CRS), involving the infiltration of blood monocytes into the lung (Henderson et al., 2020; Merad and Martin, 2020), during which the viral titers decline. Eventually, in the second week post-infection, some patients will enter into a third, life-threatening, phase of acute respiratory distress syndrome (ARDS), featuring high levels of CXCL8, interleukin-

1 $\beta$  (IL-1 $\beta$ ), and other proinflammatory mediators, resulting in neutrophil recruitment (Coperchini et al., 2020; Tang et al., 2020). Considering the distinct phases of COVID-19 (Gordon et al., 2020), antiviral drugs like remdesivir may be particularly effective if given early (epithelial and monocytic stages), while immunomodulators, such as dexamethasone and the JAK1/2 inhibitor baricitinib, may be impactful later (monocytic and neutrophilic stages) (Beigel et al., 2020; Kalil et al., 2021; Perez-Alba et al., 2021).

Severe cases of COVID-19 have a dysfunctional immune response largely reflected by the CRS and decreases in most immune cells in the systemic compartment, including T, B, and natural killer (NK) cells (Tan et al., 2020), as well as monocytes, eosinophils, and basophils (Qin et al., 2020). Meanwhile, neutrophil counts and the neutrophil-to-lymphocyte ratio are elevated in the blood of patients with severe COVID-19 (Qin et al., 2020; Zhang et al., 2020). It is not yet known what underlying circumstances cause such changes in some patients but not others. As a result, the timing of therapeutics, in particular, host-directed

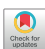

treatments targeting the immune system, needs to be paid close attention to in relation to the course of disease to avoid suppressing antiviral responses in early stages or promoting further damage in late stages. Understanding mechanistic effects of antiviral and immunomodulatory drugs during the course of COVID-19 requires models that can recapitulate the complex interactions between SARS-CoV-2, host epithelial cells, and lung-infiltrating leukocytes (Mason, 2020). To this end, we adapted a small airway model of infection and inflammation (Dobosh et al., 2021) previously developed and validated by our group to study lung-infiltrating leukocytes in cystic fibrosis (CF) and ARDS (Forrest et al., 2018; Grunwell et al., 2019). This model features a human lung epithelium (HLE) monolayer differentiated at the air-liquid interface (ALI) that enables luminal infection with SARS-CoV-2 and subsequent infiltration by primary human leukocytes.

Mimicking the early, epithelium-restricted stage of SARS-CoV-2 infection in humans (Ravindra et al., 2021), HLE-ALI cells infected with SARS-CoV-2 *in vitro* did not upregulate canonical antiviral pathways or express inflammatory cytokines. Next, we observed, by reanalysis of a previously published dataset of single-cell RNA-seq (scRNA-seq) of bronchoalveolar lavage fluid (BALF) from patients with severe COVID-19 (Liao et al., 2020), that lung-infiltrating monocytes express *CXCL8* and *IL-1 $\beta$*  and contain transcripts from SARS-CoV-2; both features were recapitulated by lung-infiltrating monocytes *in vitro*. *CXCL8* and *IL-1 $\beta$*  are critical to the development of ARDS via recruitment and activation of neutrophils (Donnelly et al., 1993; Zhou et al., 2020). We next leveraged this model to investigate the effects on HLE-ALI cells and lung-infiltrating monocytes of remdesivir and baricitinib, two drugs that have been granted emergency use authorization by the US Food and Drug Administration as single and combined therapies. While remdesivir blocked progression of viral replication in both cell types, baricitinib selectively enhanced the expression of antiviral genes in lung-infiltrating monocytes. Both drugs used alone or in combination enhanced viral clearance in monocytes. Taken together, our findings confirm that lung-infiltrating monocytes are a critical target for COVID-19 treatment.

## RESULTS

### Antiviral signaling in human lung epithelium differentiated at the air-liquid interface is blocked by SARS-CoV-2 and is not rescued by baricitinib and/or remdesivir

Critical aspects of virus-host interactions in the lung are species-specific, which makes models of the human lung particularly relevant for mechanistic investigations. Here, we differentiated an HLE for two weeks at ALI on a scaffold enabling *en masse* transmigration of leukocytes to simultaneously investigate the dynamics of luminal infection by viruses and leukocyte infiltration following epithelial infection (Figure 1A). SARS-CoV-2-infected HLE-ALI cells showed minimal amounts of extracellular ATP compared with OC43- and influenza strain A/PR8/1934 (IAV)-infected cells up to 48 h post-infection at an MOI of 0.1 (Figure 1B). This suggests that the 48-h time point and MOI may be appropriate conditions to study SARS-CoV-2 infection in the absence of substantial epithelial cell toxicity. Next, we conducted a multiplexed qRT-PCR assay

of infected HLE-ALI cells at different input concentrations of virus over 72 h of infection and observed that HLE-ALI cells infected with SARS-CoV-2 and OC43 downregulated antiviral genes in contrast to IAV-infected cells (Figure 1C). For example, core IFN pathway genes *IFNA1*, *IFNLR1*, *IFNL1*, *IFNG*, and *IFNB1*, and to a lesser extent *IFNAR1* were all lowered in cells infected with coronaviruses, while the same genes were dramatically increased in IAV-infected cells. Similarly, expression of inflammatory mediators, such as *IL1 $\alpha$* , *IL-1 $\beta$* , and *CXCL8*, was consistently downregulated in SARS-CoV-2-infected cells, although *IL1 $\alpha$*  expression was observed in HLE-ALI cells infected with OC43. Of note, a subset of allergy-associated genes, such as *IL4*, *IL13*, *IL4R*, *IL13RA1*, and the common  $\gamma$ -chain *IL2RG*, were upregulated in most of the SARS-CoV-2 infection conditions. Also of interest, infection with SARS-CoV-2 at an MOI of 1 showed upregulation of *ACE2* throughout the course of infection, suggesting that the virus may be able to enhance its own infection efficiency.

In order to better understand the global changes in the infected HLE-ALI cells, we then sequenced their entire transcriptome. As before, infection with IAV/PR8/1934 (IAV; MOI 0.1) induced canonical antiviral signaling in HLE-ALI cells, most notably *IFITM1/2/3*, *ISG15*, and *OAS1/2/3*, while infection with betacoronaviruses (MOI 0.1) OC43 and SARS-CoV-2, isolate USA-WA1/2020, did not (Figure 2A; Table S1). Across all infections, 50 gene ontology (GO) terms were significantly enriched (Table S2). Most genes enriched in HLE-ALI cells infected with IAV related to the immune response, particularly the response to virus and immune effector processes. In contrast, the enrichment profiles of HLE-ALI cells infected with OC43 and SARS-CoV-2 related to cellular processes, such as localization, transport, and metabolism (Figure 2B). Many of the antiviral genes upregulated in IAV-infected HLE-ALI cells were not upregulated in OC43 and SARS-CoV-2 infections (Figure 2C). Additionally, the genes associated with cellular processes in SARS-CoV-2-infected cells were similarly downregulated or remained unchanged in IAV-infected cells (Figure 2C; Table S2, row 9).

Further analysis of the RNA-seq dataset revealed that at 48 h post-infection with SARS-CoV-2 at an MOI of 0.1, HLE-ALI cells had the greatest number of uniquely differentially expressed genes (DEGs) compared with the uninfected time = 0 control (Figure S1A). At both 24 and 48 h post-infection, these DEGs showed dramatic changes in pathways associated with metabolic processes, showing that the HLE-ALI cells were affected by infection with SARS-CoV-2 despite the avoidance of canonical antiviral signaling (Figure S1B; Table S3).

Following SARS-CoV-2 infection of the lung epithelium, subjects may remain asymptomatic or progress toward COVID-19. *In vivo* studies suggest that the pivotal response distinguishing asymptomatic from symptomatic subjects is the induction of a proinflammatory phase driven by lung-infiltrating monocytes (Falasca et al., 2020; Li et al., 2021). To investigate this key process in our model, we applied primary human blood monocytes to the basolateral side of SARS-CoV-2-infected HLE-ALI cells and allowed them to transmigrate across. To mimic *in vivo* conditions, the epithelial phase of infection was allowed to proceed for 48 h without any drug treatment, while the monocytic phase was studied for another 24 h in vehicle control (no drug condition) or in the presence of baricitinib (1  $\mu$ M) and/or remdesivir (1  $\mu$ M)

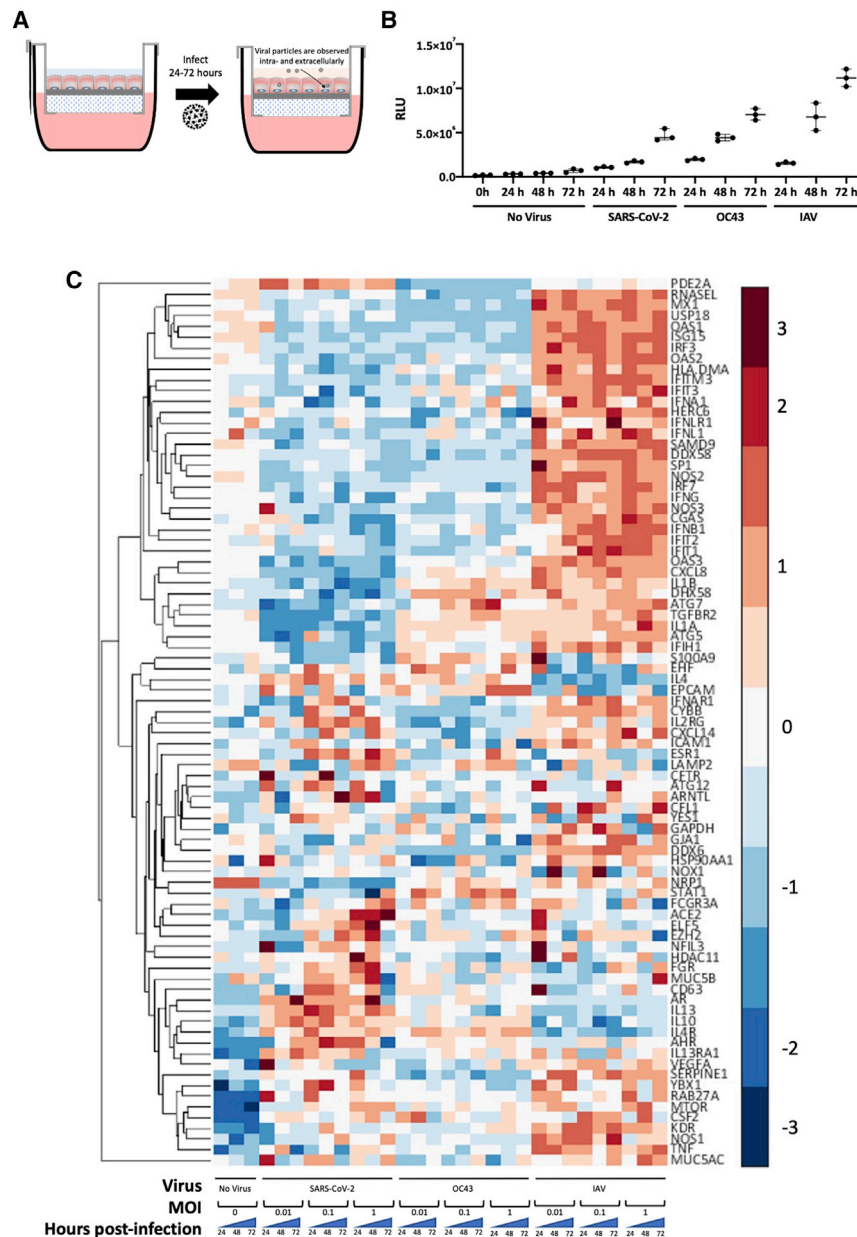

**Figure 1. HLE-ALI cells grown at the air-liquid interface can be infected by OC43, SARS-CoV-2, and influenza and exhibit different transcriptional responses**

(A) Experimental scheme illustrating the infection of human lung epithelium (HLE) differentiated at the air-liquid interface (ALI) with influenza A strain A/PR8/1934 (IAV), betacoronaviruses OC43, or SARS-CoV-2, isolate USA-WA1/2020, for 24–72 h. (B) Extracellular ATP generated by HLE-ALI cells infected with IAV, OC43, or SARS-CoV-2 at an MOI of 0.1 for 24–72 h was measured using a luciferase assay. Plotted is the median with interquartile range. No statistics were calculated due to low sample number.

(C) Multiplexed qRT-PCR of HLE-ALI cells infected with either no virus or influenza A strain A/PR8/1934, betacoronaviruses OC43, or SARS-CoV-2, isolate USA-WA1/2020, for 24–72 h at MOIs of either 0.01, 0.1, or 1. Data were normalized using the delta delta Ct method relative to glyceraldehyde-3-phosphate dehydrogenase (GAPDH) and the no virus condition at time 0, and then Z score normalized. Values shown are the average of biological triplicates.

cyte transmigration occurred in the presence of virus (Figure S1A). Approximately 55% of the upregulated DEGs were shared in all conditions, suggesting that these genes are commonly expressed by HLE-ALI cells during the course of transmigration. Furthermore, most of the uniquely downregulated genes were observed in the no drug condition, suggesting that remdesivir and baricitinib have minimal effects on HLE-ALI cells, unless they are infected by SARS-CoV-2 (Figure S3A). Many of the GO terms observed were related to changes in cellular morphology and metabolic remodeling (Figure S3B; Table S5). Similarly, about 59% of the upregulated DEGs and 34% of the downregulated genes were shared by all conditions (Figure S4A), and many of the same metabolic process GO terms were observed.

Notably however, the no drug condition showed an enrichment of GO terms associated with MHC class II antigen presentation (Figure S4B; Table S6).

Moreover, in concordance with the biological processes identified in SARS-CoV-2-infected HLE-ALI cells pre-transmigration by monocytes (Figure 2B), SARS-CoV-2-infected HLE-ALI cells post-transmigration still failed to induce genes included under the response to virus or immune system processes GO terms (Figure S5). Taken together, these findings suggest that during early SARS-CoV-2 infection, epithelial antiviral responses are delayed or blocked while favoring cellular and metabolic processes and regulation of communication. Remdesivir treatment did not induce an enrichment of these pathways when SARS-CoV-2

(Figure 3A). The chemoattractants, CCL2 (250 pg/mL) and LTB<sub>4</sub> (100 nM), were used in all conditions.

To understand the impact of monocyte transmigration on the epithelium, we identified DEGs in HLE-ALI cells pre- versus post-transmigration. From these DEGs, we listed the top 10 GO enrichment profiles (Figure S2; Table S4). Following transmigration by monocytes, HLE-ALI cells showed an enrichment in genes related to the regulation of cell communication, signaling, and multicellular organismal processes, which was abrogated when HLE-ALI cells had been infected by SARS-CoV-2 prior to monocyte transmigration (Figure S2). Moreover, in the absence of SARS-CoV-2, transmigration of monocytes showed many fewer DEGs in the HLE-ALI cells (Figure S3A) than when mono-

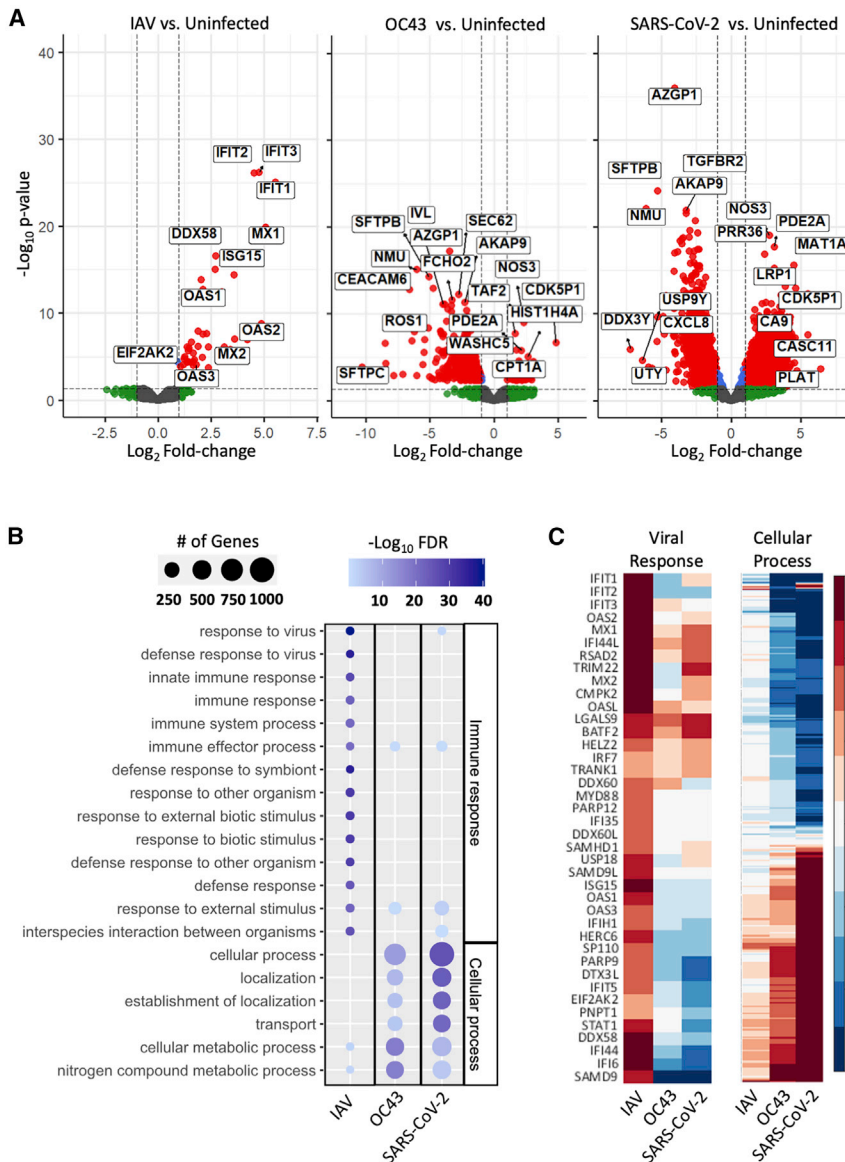

**Figure 2. SARS-CoV-2 prevents induction of an antiviral response in differentiated human lung epithelium**

HLE-ALI cells were infected at an MOI of 0.1 with IAV, OC43, or SARS-CoV-2 for 48 h, after which total RNA was extracted and library prepared following the protocol of the TruSeq RNA Sample Preparation Kit.

(A) Volcano plots of differentially expressed genes (DEGs) in HLE-ALI cells infected with IAV, OC43, and SARS-CoV-2 compared with uninfected cells. (B) Gene ontology enrichment profiles of DEGs in HLE-ALI cells infected with IAV, OC43, or SARS-CoV-2. Gene names associated with GO terms are in Table S2C. Heatmaps of targeted analysis of genes associated with the viral response or cellular process pathways. Gene names associated with the cellular process terms are in Table S2, row 9, and raw expression values in Table S1.

was present. Baricitinib treatment, however, promoted an enrichment in GO terms related to the regulation of cell communication and signaling in the SARS-CoV-2-infected epithelium post-transmigration, suggesting that this drug can affect epithelial signaling (Figures S2 and S4).

#### After transmigration across SARS-CoV-2-infected HLE-ALI cells, human monocytes induce proinflammatory signaling, which is attenuated by baricitinib treatment

To investigate the expression profile of lung-infiltrating monocytes during SARS-CoV-2 infection (compared with uninfected conditions), a set of 67 genes was measured by multiplexed qRT-PCR, and grouped by unsupervised clustering (Figure 3B). Nucleic acid signaling sensor (*CGAS* and *STING1*, *DDX58*, and *OAS1/2/3*), kinase (*TBK1*), effector (*RNAse L*), and transcription factor (*IRF3* and *IRF7*) genes as well as critical neutrophil chemo-

attractant genes, such as *CXCL8* and *IL-1 $\beta$* , were upregulated in monocytes recruited across SARS-CoV-2-infected HLE-ALI cells. The same set of genes were extracted from the RNA-seq dataset of the HLE-ALI cells pre- and post-transmigration. Although the post-transmigration HLE-ALI cells did not show global enrichment of antiviral pathways by analysis of GO terms compared with the pre-transmigration control, specific antiviral genes, such as *DDX58* and *OAS1/2/3*, and the proneutrophilic chemokine *CXCL8* were also upregulated (Figure S5). This response was not affected by treatment with baricitinib and/or remdesivir.

Computational analysis of a publicly available scRNA-seq dataset from the BALF of COVID-19 patients hospitalized with COVID-19 (Liao et al., 2020) confirmed that lung-infiltrating monocytes (differentiated from macrophages

by exclusion of the macrophage gene *MARCO*) displayed elevated *CXCL8* and *IL-1 $\beta$*  in patients with severe rather than mild disease (Figures 4A and S6). To our knowledge, this is the only dataset that has obtained scRNA-seq from BALF of hospitalized patients spanning mild and severe COVID-19, pre-remdesivir. Another study, which analyzed BALF from patients with severe COVID-19, found that there was expression of numerous inflammatory cytokines in BALF cells from a variety of cell types, particularly neutrophils (Bost et al., 2021). However, that study was conducted later during the course of the COVID-19 pandemic and did not report on BALF from relatively milder COVID-19.

Epithelial cells recovered in BALF of severe COVID-19 patients upregulated cell-death-associated pathways and downregulated genes associated with antigen presentation, both of which may promote inflammation by innate immune cells (Figure 4B;

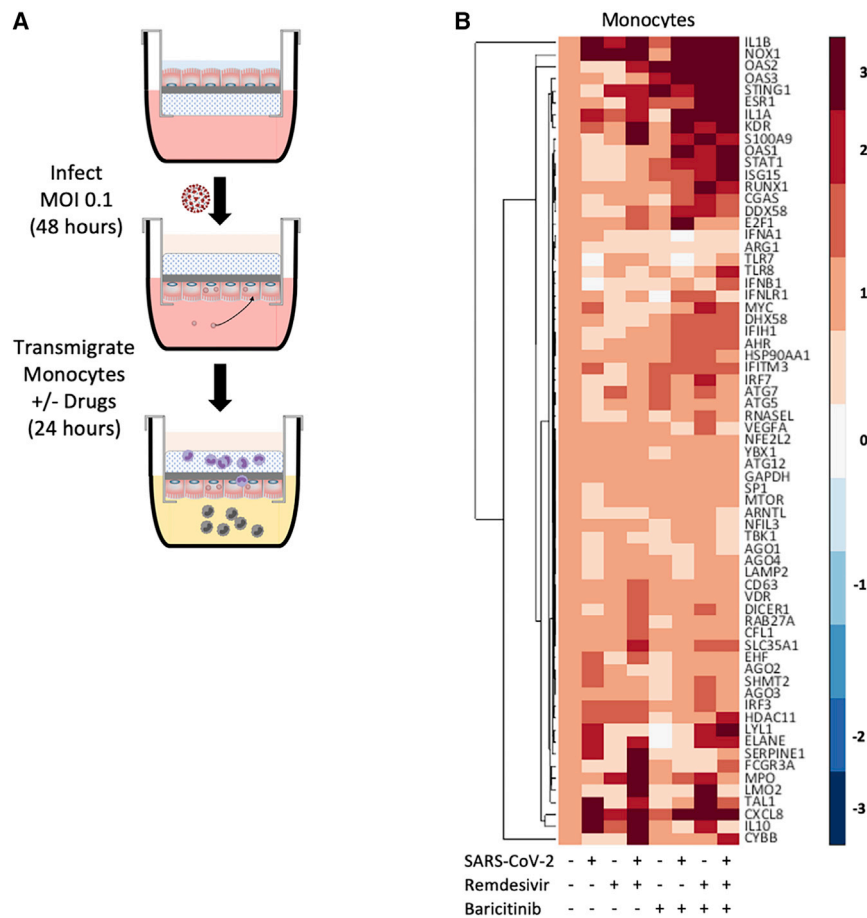

**Figure 3. Lung-recruited primary human monocytes induce proinflammatory signaling after transmigration across a SARS-CoV-2-infected epithelium**

(A) Schematic diagram of the monocyte transmigration process: HLE-ALI cells were differentiated at ALI for two weeks and infected with SARS-CoV-2 at an MOI of 0.1 for 48 h, after which  $10^6$  monocytes were transmigrated across the infected epithelium toward leukotriene B4 (LTB4) (100 nM) and C-C motif chemokine ligand 2 (CCL2) (250 pg/mL) for 24 h, in the absence or presence of remdesivir (1  $\mu$ M) and/or baricitinib (1  $\mu$ M). All conditions contained 0.1% v/v DMSO.

(B) Heatmaps of selected genes from each treatment condition. Monocyte mRNA was analyzed by multiplexed qRT-PCR and first normalized to GAPDH using the delta delta Ct method and then Z score normalized.

nation with remdesivir decreased extracellular IL-10 levels. This coincided with a decrease in *IL-10* transcripts in lung-infiltrating monocytes but not epithelial cells (Figures 3B and S5). Baricitinib treatment also increased extracellular CXCL8 levels, while its combination with remdesivir decreased IL-1 $\alpha$ , IL-1 $\beta$ , IL-6, TNF- $\alpha$ , VEGFA, and IFN- $\gamma$  levels (Figure 5A).

**Treatment with baricitinib and remdesivir decreases total viral burden in lung-infiltrating monocytes, which acquire SARS-CoV-2 from infected epithelium**

Importantly, the JAK1/2 pathway can promote leukocyte recruitment in the lung

(Table S7). In addition to *CXCL8*, mentioned above, infiltrated monocytes present in the BALF of severe COVID-19 patients upregulated many chemokines, such as *CCL4*, *CCL7*, *CCL4L2*, *CCL3*, *CXCL2*, *CXCL3*, and *CCL2*, most of which are potent monocyte and macrophage chemoattractants and actually downregulated pathways associated with antigen presentation, similar to the epithelial cells (Figure 4B; Table S8). In addition, patients with severe disease showed a greater number of neutrophils in BALF compared with those with mild COVID-19, in whom monocytes and T cells were more abundant. These responses are consistent with those observed in lung-infiltrating monocytes produced *in vitro* (Figure 3B).

Next, we sought to confirm that changes in the expression of immune mediator genes was reflected in protein levels present in the apical aspect of our small airway model. Monocyte transmigration following SARS-CoV-2 infection of the epithelium led to increased extracellular levels of CRS-associated mediators, such as CXCL8, IL-1 $\beta$ , IL-10, granulocyte-macrophage colony-stimulating factor (GM-CSF), IL-1 $\alpha$ , IL-6, granulocyte-colony-stimulating factor (G-CSF), tumor necrosis factor alpha (TNF- $\alpha$ ), vascular endothelial growth factor A (VEGFA), and IFN- $\gamma$ , in the fluid compared with conditions where monocyte transmigration was conducted in the absence of virus (Figure 5A). While remdesivir treatment did not alter mediator levels, baricitinib treatment alone and in combi-

and, in our model treatment with the JAK1/2 inhibitor baricitinib, decreased the number of lung-infiltrating monocytes (Figure 5B), which we determined by a qPCR-based DNA quantitation method (Figure S7A). As expected, remdesivir treatment decreased the viral burden in the HLE-ALI cells (Figure 5C), as measured by qRT-PCR (Figures S7B and S7C), despite the 48 h afforded to the virus to infect epithelial cells prior to treatment.

Our re-analysis of publicly available scRNA-seq data from lung-infiltrating monocytes in the BALF of patients with severe COVID-19 revealed that some of them harbored SARS-CoV-2 transcripts (Figure 4A). In severe COVID-19 patients included in another BALF study, infiltrating monocytes also contained SARS-CoV-2, although a vast majority of viral transcripts were found in the neutrophil compartment (Bost et al., 2021). Similarly, lung-infiltrating monocytes in our model, which were not directly infected but rather were made to cross an infected epithelium, also contained SARS-CoV-2 genome copies, as determined by qRT-PCR (Figures S5D and S7D). The total viral burden in lung-infiltrating monocytes was decreased in all treatment conditions, with the greatest effect being contributed by remdesivir. Absolute quantification of SARS-CoV-2 in both epithelial and monocytic compartments showed similar results as relative quantification of SARS-CoV-2 to *GAPDH* and *18S rRNA*

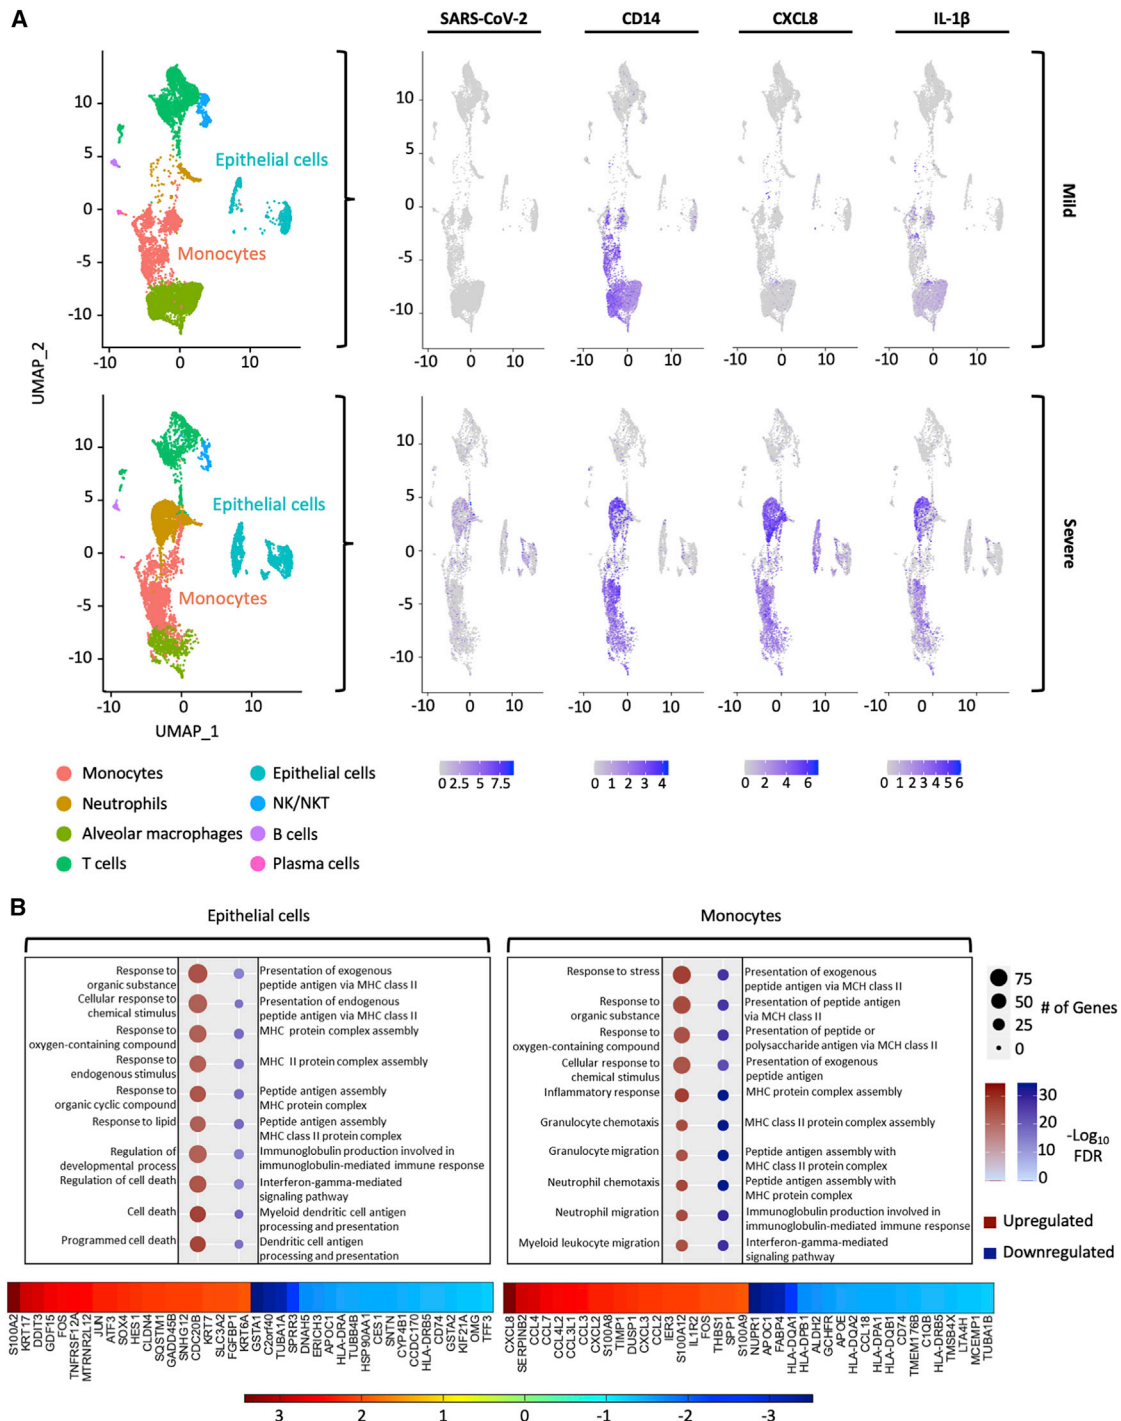

**Figure 4.** scRNA-seq of BALF from patients hospitalized with mild or severe COVID-19 shows that monocytes harbor SARS-CoV-2 genomes and express CXCL8 and IL-1 $\beta$  among other chemokines

(A) Combined Uniform Manifold Approximation and Projection (UMAP) plots of scRNA-seq from  $n = 3$  mild patients and  $n = 3$  severe patients. Seurat was used to normalize gene barcodes and generate UMAP clustering plots. Expression values for SARS-CoV-2, CD14, CXCL8, and IL-1 $\beta$  were overlaid onto the UMAP plot. (B) DEGs in cells identified as epithelial cells or monocytes between the severe and mild patient groups were investigated. Enriched pathways for each cell type were plotted based on whether they were up- or down-regulated (severe versus mild). The top 20 up- and down-regulated genes were listed for both cell types and plotted as a heatmap.

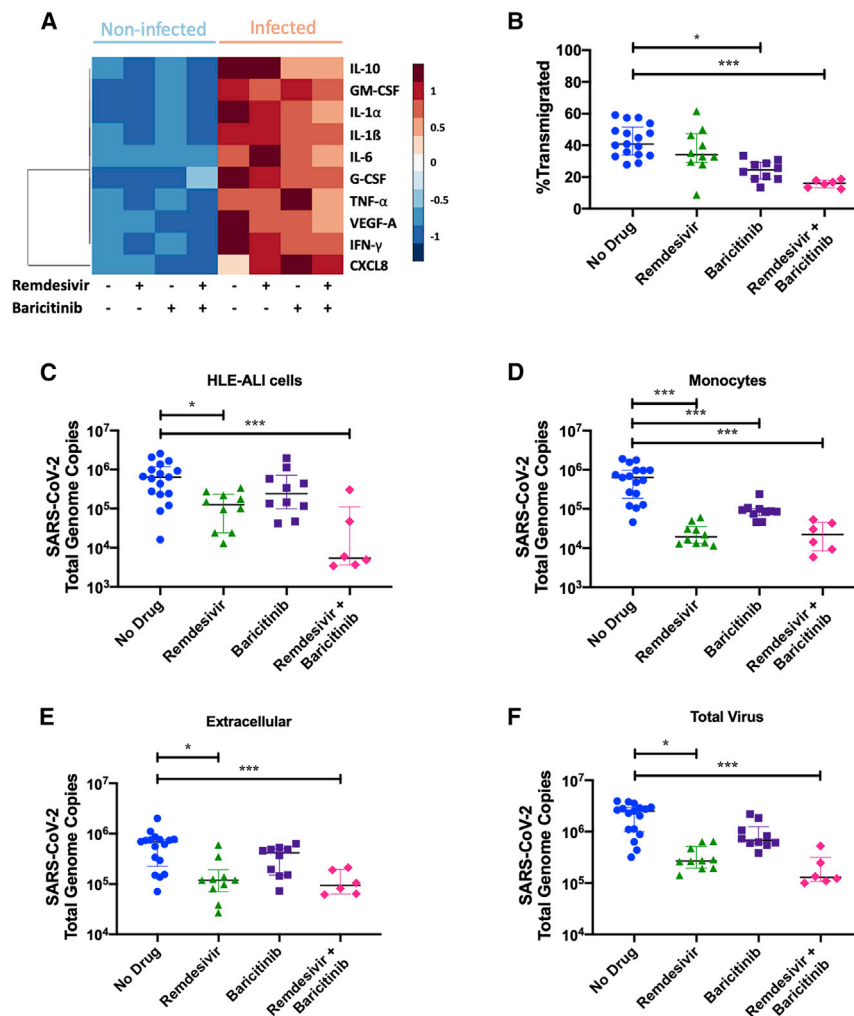

**Figure 5. Lung-infiltrating monocytes release inflammatory mediators and harbor replicative SARS-CoV-2**

(A) Inflammatory mediators in the apical fluid following transmigration were quantified by a multiplexed electrochemiluminescent assay. The Z score for each mediator in each condition was calculated and plotted.

(B) Transmigration efficiency of monocytes was calculated by dividing the number of monocytes in the apical fluid after 24 h by the input number of cells.

(C–E) RNA was extracted from each component of the model (epithelium, lung-infiltrating monocytes, and extracellular fluid) and reverse transcribed. Total SARS-CoV-2 genome copies were calculated.

(F) The sum of each of the components of the model was calculated to depict the total amount of virus remaining in the system after monocytes were allowed to transmigrate for 24 h.

All statistics were calculated using the Mann-Whitney U-test in Prism between the “no drug” and each treatment group. \* $p < 0.05$ , \*\* $p < 0.01$ , \*\*\* $p < 0.001$ . Shown are median and interquartile range.

transcripts (Figures S8A–S8D). SARS-CoV-2 genome copies were also detectable in the extracellular fluid and were decreased by treatment with remdesivir alone and combined with baricitinib (Figure 5E). Altogether, remdesivir decreased total virus in all compartments of the transmigration model, while baricitinib did not have a noticeable effect despite lowering the number of genome copies in the recruited monocytes (Figure 5F).

In the 72 h during which the virus was applied to the HLE-ALI cells from start to finish of transmigration experiments, HLE-ALI cells had a median of  $6.3 \times 10^5$  viral genome copies in the absence of drugs, which is about 5 $\times$  the initial input (Figure 5C). To determine if viral replication occurred, we assessed SARS-CoV-2 N-subgenome relative to 18S rRNA transcripts in HLE-ALI cells. There was a detectable amount of N-subgenome that remained unchanged in conditions including remdesivir. However, treatment with baricitinib resulted in an  $\sim 2^4$ -fold increase in the N-subgenome relative amount (Figure S7E). Relative to 18S rRNA transcript, all treatment conditions increased the amount of N-subgenome compared with the untreated con-

trol in monocytes (remdesivir:  $\sim 2^1$ ; baricitinib:  $\sim 2^3$ , and remdesivir + baricitinib:  $\sim 2^1$ ) (Figure S7F).

In order to gain a better understanding of how SARS-CoV-2 enters monocytes, we analyzed the expression of surface angiotensin-converting enzyme 2 (ACE2) and also included various treatments during transmigration known to affect SARS-CoV-2 entry into cells. Blood monocytes were found to express surface ACE2 as measured by flow cytometry, and ACE2 appeared to be slightly upregulated upon transmigration (Figure S9A). The observation that immune cells, including monocytes and macrophages, express ACE2 and thus could be susceptible to direct SARS-CoV-2 infection has been validated by many groups (Abassi et al., 2020). Accordingly, the inclusion of soluble ACE2 (200  $\mu\text{g}/\text{mL}$ , also contained a C-terminal 10xHis-tag) lowered the amount of SARS-CoV-2 observed in the monocytes, as other groups have shown (Krishnamurthy et al., 2021; Monteil et al., 2020). Next, the use of the antibiotic dalbavancin (1  $\mu\text{M}$ ), which has been shown to bind to the ACE2 receptor (Wang et al., 2021), also decreased the amount of SARS-CoV-2 in transmigrated monocytes. As a control, the use of either soluble ACE2 or dalbavancin did not decrease the amount of OC43 in the monocytes (Figure S9B). The dynamin GTPase inhibitor and pinocytosis blocker dynasore (80  $\mu\text{M}$ ) and endocytosis inhibitor pitstop2 (15  $\mu\text{M}$ ) also inhibited SARS-CoV-2 entry into monocytes. Taken together, these findings indicate that SARS-CoV-2 likely enters monocytes through a variety of mechanisms, including ACE2-receptor-mediated endocytosis,



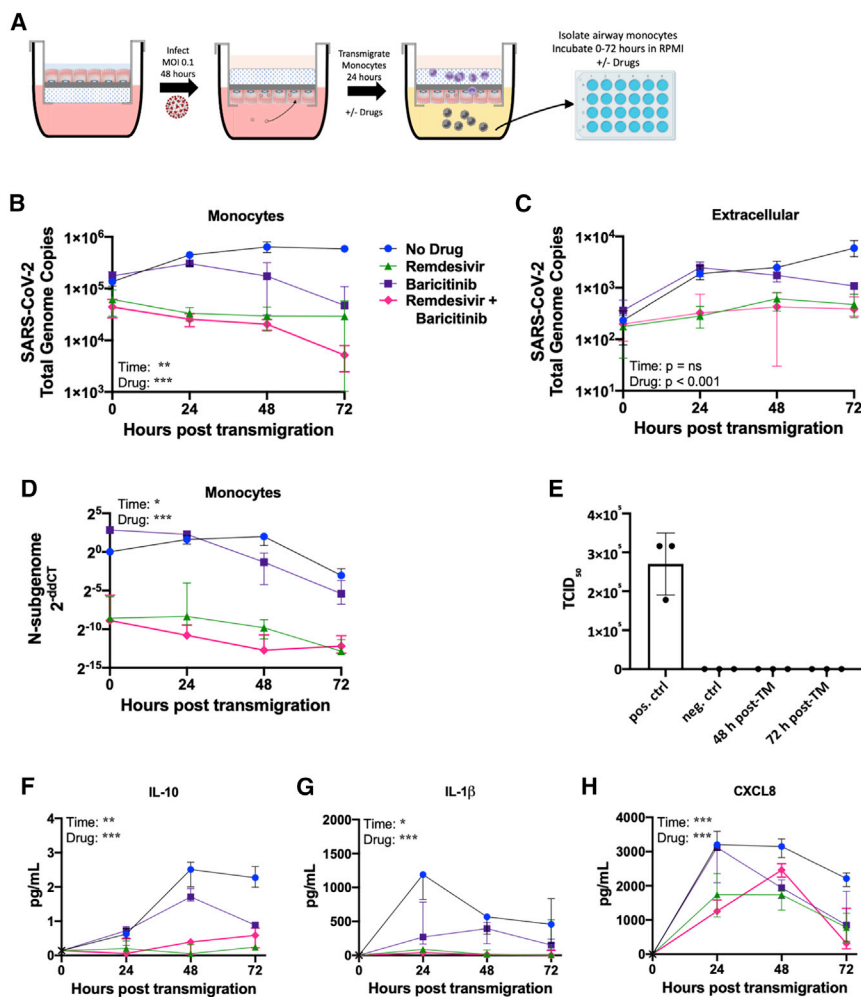

**Figure 6. Treatment with baricitinib and remdesivir increases the rate of viral clearance in lung-infiltrating monocytes**

(A) Schematic of the experimental setup to quantify replication of the virus in monocytes. HLE-ALI cells were infected with SARS-CoV-2 at an MOI 0.1 for 48 h, after which  $10^6$  monocytes were transmigrated across the infected epithelium toward LTB4 (100 nM) and CCL2 (250 pg/mL) for 24 h, in the absence/presence of remdesivir (1  $\mu$ M) and/or baricitinib (1  $\mu$ M). Monocytes were washed and purified by negative depletion using anti-CD326 beads to remove contaminating epithelial cells and placed into medium with no drug, remdesivir (1  $\mu$ M), and/or baricitinib (1  $\mu$ M) for 0–72 h. All conditions contained 0.1% v/v DMSO.

(B) Quantification of total SARS-CoV-2 genome copies in the monocytes.

(C) Quantification of the amount of virus in the extracellular fluid at each time point.

(D) Quantification of the N-subgenome in monocytes at each time point. Data were normalized to 18S rRNA in the untreated condition at 0 h using the delta delta Ct method.

(E) The extracellular fluid was layered onto VeroE6 cells to perform a plaque assay from which a TCID<sub>50</sub> was calculated. The positive control was the direct application of  $2.5 \times 10^4$  genome copies of SARS-CoV-2 to the cells.

(F–H) Inflammatory mediators were measured using an electrochemiluminescent assay.

All statistics were calculated with a two-way ANOVA, main effects model in Prism with Geisser-Greenhouse correction applied. \* $p < 0.05$ , \*\* $p < 0.01$ , \*\*\* $p < 0.001$ . Shown are median and interquartile range.

either with or without the aid of clathrin (Bayati et al., 2021), as well as pinocytosis.

### Treatment with baricitinib and remdesivir decreases the rate of viral clearance and replication in lung-infiltrating monocytes harboring SARS-CoV-2

Since SARS-CoV-2 genome copies were detectable in lung-infiltrating monocytes, we examined whether these genomes were replication-competent. To this end, we isolated and washed lung-infiltrating monocytes via negative selection with anti-CD326 beads to remove contaminating epithelial cells and incubated the purified monocytes in fresh medium for 72 h (Figure 6A). Every 24 h, RNA and protein were isolated from the monocytes and the extracellular fluid. In the absence of drug, viral genome copies in monocytes increased from 0 to 48 h and then plateaued (Figure 6B) while extracellular viral genome copies steadily increased across the 72 h (Figure 6C). Since baricitinib induced the expression of several antiviral genes and remdesivir reduced viral genome copies in lung-infiltrating monocytes in our model, we next tested the effect of these drugs on viral propagation upon an additional 72 h of culture. As expected, treatment

with remdesivir abrogated the replication of the virus and few genome copies were detected in monocytes. Treatment with baricitinib decreased viral genome copies in monocytes at 48- and 72-h time points, suggesting that this drug may also promote clearance of virus by lung-infiltrating monocytes. Furthermore, treatment with remdesivir alone or in combination with baricitinib resulted in a stark decrease in levels of N-subgenome in monocytes at all time points (Figure 6D). Treatment with baricitinib also lowered N-subgenome in monocytes compared with the untreated control at 48- and 72-h time points.

Because the virus replicated its genome in lung-infiltrating monocytes, we next sought to determine whether infectious particles could be formed from these cells. To this end, the extracellular fluid from monocyte cultures collected at 48- and 72-h time points were applied to virus-permissive VeroE6 cells. Remarkably, no plaques or cytopathic effects were observed (Figures 6E and S10), an observation repeated with a foci assay. These findings suggest that although lung-infiltrating monocytes in our *in vitro* model are amenable to SARS-CoV-2 genome replication, a blockade exists in these cells that results in abortive virus.

Finally, to better understand the inflammatory state of lung-infiltrating monocytes harboring viral genome copies, we performed a multiplexed electrochemiluminescent assay to quantify mediators released by these cells. While extracellular IL-10 levels steadily increased from 0 to 48 h in the absence of drugs, treatment with baricitinib alone or in combination with remdesivir kept those levels low (Figure 6F). Treatment with remdesivir alone increased extracellular IL-10 levels, although not to the same levels as in the untreated control conditions. Extracellular levels of CXCL8 and IL-1 $\beta$  were higher in the absence of drug at 0- and 24-h time points than in all treatment groups. However, treatment with baricitinib lowered the magnitude of IL-1 $\beta$  increase, suggesting that this drug may promote lower grade neutrophilic inflammation. Although treatment with remdesivir resulted in lower levels of CXCL8 and IL-1 $\beta$  (Figures 6G and 6H), it elevated levels of IL-1 $\alpha$  compared with the untreated control condition at 24- and 48-h time points (Figure S11A). IFN- $\gamma$  increased over time in the untreated control condition but remained low in all treatment groups (Figure S11B), while no effects were observed with IL-6, TNF- $\alpha$ , G-CSF, GM-CSF, and VEGF-A (Figures S11C–S11G).

## DISCUSSION

COVID-19 includes an early viral phase and a later immune phase. Upon infection by SARS-CoV-2, differentiated epithelial cells in the small airway model show enhanced proapoptotic signaling and attenuated type I IFN signaling, which may allow for enhanced viral propagation during early disease and prevent mounting of an effective innate immune response by epithelial and myeloid cells. An ineffective innate immune response with suboptimal type I IFN signaling can impede development of subsequent type II IFN (IFN- $\gamma$ )-dependent adaptive immune responses (Zuniga et al., 2015), as occurs in severe COVID-19 (Rao et al., 2020). Prior studies noted that SARS-CoV-2-infected human lung tissue failed to upregulate IFN genes during infection and that, in patients with severe COVID-19, lung-infiltrating monocytes showed a reduced IFN signature compared with patients with mild disease (Chu et al., 2020; Schulte-Schrepping et al., 2020). In contrast with prior studies that did not combine differentiated epithelial cells with infiltrating leukocytes (Vanderheiden et al., 2020), our small airway model did show increased IFN- $\gamma$  release upon SARS-CoV-2 infection.

As viral burden wanes, host responses may devolve into CRS, featuring proinflammatory mediators supporting monocyte infiltration combined with high IL-10 levels, which act to initially limit neutrophil recruitment (Eroshenko et al., 2020). To overcome the barrier posed by IL-10, lung-infiltrating virus-infected monocytes may synthesize additional CXCL8, which eventually results in neutrophil infiltration, leading to ARDS. Moreover, high levels of monocyte-derived IL-1 $\beta$  can also overcome IL-10 blockade and promote neutrophilic inflammation (Dinarello, 2018). Lung-infiltrating monocytes in our model were infected by SARS-CoV-2 from the epithelium. They subsequently increased expression of proinflammatory genes, including CXCL8 and IL-1 $\beta$ , among other changes in their transcriptional poise, likely to contribute to further inflammation. This mirrors *in vivo* findings that infiltrating monocytes isolated from the BALF of severe

COVID-19 patients contain SARS-CoV-2 transcripts and increased expression of CXCL8 and IL-1 $\beta$  and multiple other chemokines, including CCL4, CCL7, CCL3, and CCL2. These findings implicate lung-infiltrating monocytes as key contributors to COVID-19 progression. Thus, our model recapitulates the distinct phases in the clinical progression of COVID-19, including initial immune avoidance in epithelial cells, recruitment of airway monocytes, and the release of inflammatory molecules reflective of CRS and, later, ARDS.

Although the viral products detected in lung-infiltrating monocytes were abortive, these cells may yet act as a reservoir of virus or as a continuing source of inflammatory cytokines and contribute not only to fueling the CRS but also to paving the way for neutrophil-driven ARDS. Furthermore, it is possible that replicative SARS-CoV-2 in airway monocytes serves as a continual source of dsRNA-stimulation, resulting in inflammatory cytokine release contributing to symptomatology, seen in so-called “long-haulers,” i.e., patients who have relatively mild disease weeks or even months after the initial infection. Indeed, it was previously observed that CD16<sup>+</sup> blood monocytes expressed SARS-CoV-2 S1 spike protein up to 15 months after initial SARS-CoV-2 infection, despite the inability to isolate full-length viral RNA (Patterson et al., 2021). The finding that monocytes harbor cell-associated SARS-CoV-2 copies has been observed by others and poses a key therapeutic opportunity for early host-directed disease intervention. In one study, blood monocytes were able to be infected by SARS-CoV-2 in an antibody-dependent manner, triggering inflammasome activation and contributing to severe COVID-19 pathology (Junqueira et al., 2021). In another study, circulating lymphomononuclear cells, including monocytes as well as T and B cells were susceptible to SARS-CoV-2 infection (Pontelli et al., 2020). A third study described that blood monocytes and differentiated macrophages could be infected by SARS-CoV-2, resulting in abortive viral products (Boumaza et al., 2021). However, these prior instances were in blood monocytes, not lung-infiltrating cells, as used in our study, which we previously showed to acquire a distinct transcriptional poise (Ford et al., 2021). Recently, another group showed that tissue-resident alveolar macrophages take up and replicate SARS-CoV-2, after which a type I IFN response ensued (Sefik et al., 2022).

In the Adaptive COVID-19 Treatment Trial 1 (ACTT-1), the antiviral remdesivir showed greatest clinical benefits (improved time to recovery) in patients with an ordinal oxygen score of 4 or 5 (not receiving or receiving low-flow oxygen, respectively) compared with a placebo, suggesting that antivirals will work best in early-stage disease (Beigel et al., 2020). ACTT-2 evaluated baricitinib in combination with remdesivir against baricitinib alone (Kalil et al., 2021). The combined treatment shortened total time to recovery and had more improvement in symptoms and fewer adverse events than the control group. The efficacy of combined baricitinib and remdesivir treatment was greatest in patients who had an ordinal score of 6 at baseline (receiving high-flow oxygen or a non-invasive ventilation), indicating the profound effects of baricitinib on more severe late-stage disease. In the subset of patients who started treatment at an ordinal score of 6, time to recovery was shortened from 18 days in the group to 10 days in the combination group (Kalil et al., 2021).

In rhesus macaques infected with SARS-CoV-2, baricitinib given alone from 2 to 10 days post-infection suppressed proinflammatory cytokine production in lung macrophages, reduced recruitment of neutrophils, and resulted in reduced lung pathology compared with the control group. However, viral load in nasal and throat swabs as well as BALF was unchanged (Hoang et al., 2021). Other groups have proposed that, in addition to its immunomodulatory effects via JAK1/2 inhibition, baricitinib treatment may have a direct effect on SARS-CoV-2 viral entry via ACE2 by inhibiting numb-associated kinases to prevent clathrin-mediated endocytosis (Stebbing et al., 2020). Our study supports the notion that treatment with baricitinib (alone and in combination with remdesivir) reduces viral load in lung-infiltrating monocytes and that baricitinib (alone and in combination with remdesivir) reduces viral replication and the release of inflammatory mediators. Meanwhile, an exploratory trial evaluating baricitinib plus standard of care versus a placebo plus standard of care found that the treatment group had a lower mortality rate at both 28 and 60 days, although ventilator-free days and length of hospital duration were unchanged (Ely et al., 2022). At such late time points post-infection, viral titers are low and baricitinib is likely functioning primarily as an immunomodulator.

Findings presented here are made relevant to the clinical prevention and resolution of COVID-19 by, first, comparing our *in vitro* data to *in vivo* scRNA-seq data from patients with severe COVID-19 and, second, by using the approved drugs remdesivir and baricitinib. These drugs may now be tested in combination with or as comparators for emerging therapies to bring to trial. Findings here suggest that candidate drugs can affect the epithelium and lung-infiltrating leukocytes in different and sometimes divergent ways with regard to their impact on antiviral and immune signaling, notably. For this reason, the use of our small airway model as a testing platform for candidate COVID-19 drugs overcomes some limitations associated with using non-human/non-lung *in vitro* models.

In conclusion, we showed that HLE cells differentiated at ALI propagate SARS-CoV-2 and fail to induce antiviral signaling but can recruit monocytes. These lung-infiltrating monocytes are in turn infected by SARS-CoV-2 yet successfully induce host antiviral pathways while also activating *IL-1 $\beta$*  and *CXCL8* transcription. Critically, we show that virus-laden, *IL-1 $\beta$* - and *CXCL8*-positive monocytes are also present *in vivo* in the lung fluid of patients with severe, but not mild, COVID-19. Finally, we show that treatment with the JAK1/2 inhibitor baricitinib combined with the antiviral drug remdesivir decreases monocyte recruitment through the virus-infected epithelium and viral burden in both cell types and also alters signaling pathways in monocytes. Taken together, our findings establish that lung-infiltrating monocytes retain virus and contribute to the pathogenesis of COVID-19 and thus must be appropriately targeted for successful resolution of the disease.

### Limitations of the study

Although the human small airway model leveraged here can be generated with primary epithelial cells (Laucirica et al., 2022), the present study relies on a club cell line. In addition, blood monocytes transmigrated in the model are from healthy

subjects. Use of primary monocytes from patients may shed information on disease course in light of the observations that they may behave abnormally in severe COVID-19 (Qin et al., 2020). Finally, this study uses the Washington strain of SARS-CoV-2. Follow-up studies combining primary airway epithelial cells and monocytes from infected subjects and other SARS-CoV-2 variants of interest (e.g., Delta [B.1.617.2] or Omicron [B.1.1.529]) may help identify host-virus interactions causing the divergence between asymptomatic, mild, and severe cases.

### STAR★METHODS

Detailed methods are provided in the online version of this paper and include the following:

- KEY RESOURCES TABLE
- RESOURCE AVAILABILITY
  - Lead contact
  - Materials availability
  - Data and code availability
- EXPERIMENTAL MODEL AND SUBJECT DETAILS
  - Maintenance of submerged H441 Club cells
  - *In vitro* transmigration experiments and infection with virus
- METHOD DETAILS
  - Isolation of monocytes from transmigration fluid
  - Isolation of nucleic acids
  - Cell counting by DNA quantification
  - Flow cytometric analysis of monocytes
  - Extracellular ATP assay
  - Quantification of viral RNA via qRT-PCR
  - qRT-PCR
  - RNA quantification and quality control
  - Transcriptomic analysis of monocytes
  - RNA-sequencing of epithelial cells
  - Protein extraction
  - Quantification of inflammatory mediators
  - Single-cell RNA sequencing
- QUANTIFICATION AND STATISTICAL ANALYSIS

### SUPPLEMENTAL INFORMATION

Supplemental information can be found online at <https://doi.org/10.1016/j.celrep.2022.110945>.

### ACKNOWLEDGMENTS

This study was supported by NSF EAGER award 2032273 (to R.T., R.F.S., and K.Z.) and a Woodruff Health Science Center COVID-19 CURE award (to R.T., R.F.S., K.Z., M.B., and V.S.). R.F.S. is also funded in part by NIH grant R01MH116695. We thank Dr. Matt Frieman (University of Maryland) for sharing primer sequences targeting the N-subgenome of SARS-CoV-2. We thank Dalia Gulick, Naima Djeddar, and Gregory Gibson (Georgia Tech) for assisting with multiplexed qRT-PCR. Research reported in this publication was supported in part by the Pediatrics/Winship Flow Cytometry Core of Winship Cancer Institute of Emory University, Children's Healthcare of Atlanta. The graphical abstract was generated in Biorender. SARS-CoV-2 isolate USA-WA1/2020 was obtained from BEI Resources, Manassas, VA.

### AUTHOR CONTRIBUTIONS

B.D., K.Z., D.M.G., S.L.G., K.M., M.A., J.L., V.D.G., J.K., D.E., and J.Y. performed and analyzed experiments. M.B., V.S., and E.G. provided conceptualization and input for the work. B.D., K.Z., D.M.G., R.T., and R.F.S. wrote the original manuscript. R.F.S. and R.T. conceptualized the experiments. All authors reviewed and edited the manuscript.

### DECLARATION OF INTERESTS

R.F.S. is the inventor of the use of baricitinib for coronavirus infections and receives royalties from Eli Lilly. His conflict of interest has been reviewed and approved by Emory University. All other authors have declared that no conflict of interest exists. Contents within this manuscript are included in patent USPTO 10670594.

Received: October 25, 2021

Revised: March 22, 2022

Accepted: May 19, 2022

Published: May 25, 2022

### REFERENCES

Abassi, Z., Knaney, Y., Karram, T., and Heyman, S.N. (2020). The lung macrophage in SARS-CoV-2 infection: a friend or a foe? *Front. Immunol.* *11*, 1312. <https://doi.org/10.3389/fimmu.2020.01312>.

Acharya, D., Liu, G., and Gack, M.U. (2020). Dysregulation of type I interferon responses in COVID-19. *Nat. Rev. Immunol.* *20*, 397–398. <https://doi.org/10.1038/s41577-020-0346-x>.

Bayati, A., Kumar, R., Francis, V., and McPherson, P.S. (2021). SARS-CoV-2 infects cells after viral entry via clathrin-mediated endocytosis. *J. Biol. Chem.* *296*, 100306. <https://doi.org/10.1016/j.jbc.2021.100306>.

Beigel, J.H., Tomashek, K.M., Dodd, L.E., Mehta, A.K., Zingman, B.S., Kalil, A.C., Hohmann, E., Chu, H.Y., Luetkemeyer, A., Kline, S., et al. (2020). Remdesivir for the treatment of covid-19 – final report. *N. Engl. J. Med.* *383*, 1813–1826. <https://doi.org/10.1056/NEJMoa2007764>.

Blanco-Melo, D., Nilsson-Payant, B.E., Liu, W.C., Uhl, S., Hoagland, D., Moller, R., Jordan, T.X., Oishi, K., Panis, M., Sachs, D., et al. (2020). Imbalanced host response to SARS-CoV-2 drives development of COVID-19. *Cell* *181*, 1036–1045.e9. <https://doi.org/10.1016/j.cell.2020.04.026>.

Bost, P., De Sanctis, F., Cane, S., Ugel, S., Donadello, K., Castellucci, M., Eyal, D., Fiore, A., Anselmi, C., Barouni, R.M., et al. (2021). Deciphering the state of immune silence in fatal COVID-19 patients. *Nat. Commun.* *12*, 1428. <https://doi.org/10.1038/s41467-021-21702-6>.

Boumaza, A., Gay, L., Mezouar, S., Bestion, E., Diallo, A.B., Michel, M., Desnues, B., Raoult, D., La Scola, B., Halfon, P., et al. (2021). Monocytes and macrophages, targets of severe acute respiratory syndrome coronavirus 2: the clue for coronavirus disease 2019 immunoparalysis. *J. Infect. Dis.* *224*, 395–406. <https://doi.org/10.1093/infdis/jiab044>.

Chu, H., Chan, J.F., Wang, Y., Yuen, T.T., Chai, Y., Hou, Y., Shuai, H., Yang, D., Hu, B., et al. (2020). Comparative replication and immune activation profiles of SARS-CoV-2 and SARS-CoV in human lungs: an ex vivo study with implications for the pathogenesis of COVID-19. *Clin. Infect. Dis.* *71*, 1400–1409. <https://doi.org/10.1093/cid/ciaa410>.

Coperchini, F., Chiovato, L., Croce, L., Magri, F., and Rotondi, M. (2020). The cytokine storm in COVID-19: an overview of the involvement of the chemokine/chemokine-receptor system. *Cytokine Growth Factor Rev.* *53*, 25–32. <https://doi.org/10.1016/j.cytogfr.2020.05.003>.

Danecek, P., Bonfield, J.K., Liddle, J., Marshall, J., Ohan, V., Pollard, M.O., Whitwham, A., Keane, T., McCarthy, S.A., Davies, R.M., and Li, H. (2021). Twelve years of SAMtools and BCFtools. *Gigascience.* <https://doi.org/10.1093/gigascience/giab008>.

Dinarello, C.A. (2018). Overview of the IL-1 family in innate inflammation and acquired immunity. *Immunol. Rev.* *281*, 8–27. <https://doi.org/10.1111/imr.12621>.

Dobin, A., Davis, C.A., Schlesinger, F., Drenkow, J., Zaleski, C., Jha, S., Batut, P., Chaisson, M., and Gingeras, T.R. (2013). STAR: ultrafast universal RNA-seq aligner. *Bioinformatics* *29*, 15–21. <https://doi.org/10.1093/bioinformatics/bts635>.

Dobosh, B., Giacalone, V.D., Margaroli, C., and Tirouvanziam, R. (2021). Mass production of human airway-like neutrophils via transmigration in an organotypic model of human airways. *STAR Protoc* *2*, 100892. <https://doi.org/10.1016/j.xpro.2021.100892>.

Donnelly, S.C., Strieter, R.M., Kunkel, S.L., Walz, A., Robertson, C.R., Carter, D.C., Grant, I.S., Pollok, A.J., and Haslett, C. (1993). Interleukin-8 and development of adult respiratory distress syndrome in at-risk patient groups. *Lancet* *341*, 643–647. [https://doi.org/10.1016/0140-6736\(93\)90416-e](https://doi.org/10.1016/0140-6736(93)90416-e).

Ely, E.W., Ramanan, A.V., Kartman, C.E., de Bono, S., Liao, R., Piruzeli, M.L.B., Goldman, J.D., Saraiva, J.F.K., Chakladar, S., Marconi, V.C., et al. (2022). Efficacy and safety of baricitinib plus standard of care for the treatment of critically ill hospitalised adults with COVID-19 on invasive mechanical ventilation or extracorporeal membrane oxygenation: an exploratory, randomised, placebo-controlled trial. *Lancet Respir. Med.* *10*, 327–336. [https://doi.org/10.1016/S2213-2600\(22\)00006-6](https://doi.org/10.1016/S2213-2600(22)00006-6).

Eroshenko, N., Gill, T., Keaveney, M.K., Church, G.M., Trevejo, J.M., and Rajaniemi, H. (2020). Implications of antibody-dependent enhancement of infection for SARS-CoV-2 countermeasures. *Nat. Biotechnol.* *38*, 789–791. <https://doi.org/10.1038/s41587-020-0577-1>.

Falasca, L., Nardacci, R., Colombo, D., Lalle, E., Di Caro, A., Nicastrì, E., Antinori, A., Petrosillo, N., Marchioni, L., Biava, G., et al. (2020). Postmortem findings in Italian patients with COVID-19: a descriptive full autopsy study of cases with and without comorbidities. *J. Infect. Dis.* *222*, 1807–1815. <https://doi.org/10.1093/infdis/jiaa578>.

Ford, B.D., Moncada Giraldo, D., Margaroli, C., Giacalone, V.D., Brown, M.R., Peng, L., and Tirouvanziam, R. (2021). Functional and transcriptional adaptations of blood monocytes recruited to the cystic fibrosis airway microenvironment in vitro. *Int. J. Mol. Sci.* *22*, 2530. <https://doi.org/10.3390/ijms22052530>.

Forrest, O.A., Ingersoll, S.A., Preininger, M.K., Laval, J., Limoli, D.H., Brown, M.R., Lee, F.E., Bedi, B., Sadikot, R.T., Goldberg, J.B., et al. (2018). Frontline Science: pathological conditioning of human neutrophils recruited to the airway milieu in cystic fibrosis. *J. Leukoc. Biol.* *104*, 665–675. <https://doi.org/10.1002/JLB.5H1117-454RR>.

Gordon, D.E., Jang, G.M., Bouhaddou, M., Xu, J., Obernier, K., White, K.M., O’Meara, M.J., Rezelj, V.V., Guo, J.Z., Swaney, D.L., et al. (2020). A SARS-CoV-2 protein interaction map reveals targets for drug repurposing. *Nature* *583*, 459–468. <https://doi.org/10.1038/s41586-020-2286-9>.

Grunwell, J.R., Giacalone, V.D., Stephenson, S., Margaroli, C., Dobosh, B.S., Brown, M.R., Fitzpatrick, A.M., and Tirouvanziam, R. (2019). Neutrophil dysfunction in the airways of children with acute respiratory failure due to lower respiratory tract viral and bacterial coinfections. *Sci. Rep.* *9*, 2874. <https://doi.org/10.1038/s41598-019-39726-w>.

Henderson, L.A., Canna, S.W., Schulert, G.S., Volpi, S., Lee, P.Y., Kernan, K.F., Caricchio, R., Mahmud, S., Hazen, M.M., Halyabar, O., et al. (2020). On the alert for cytokine storm: immunopathology in COVID-19. *Arthritis Rheumatol.* *72*, 1059–1063. <https://doi.org/10.1002/art.41285>.

Hoang, T.N., Pino, M., Boddapati, A.K., Viox, E.G., Starke, C.E., Upadhyay, A.A., Gumber, S., Nekorchuk, M., Busman-Sahay, K., Strongin, Z., et al. (2021). Baricitinib treatment resolves lower-airway macrophage inflammation and neutrophil recruitment in SARS-CoV-2-infected rhesus macaques. *Cell* *184*, 460–475.e21. <https://doi.org/10.1016/j.cell.2020.11.007>.

Junqueira, C., Crespo, A., Ranjbar, S., Ingber, J., Parry, B., Ravid, S., de Lacerda, L.B., Lewandrowski, M., Clark, S., Ho, F., et al. (2021). SARS-CoV-2 infects blood monocytes to activate NLRP3 and AIM2 inflammasomes, pyroptosis and cytokine release. Preprint at medRxiv. <https://doi.org/10.1101/2021.03.06.21252796>.

Kalil, A.C., Patterson, T.F., Mehta, A.K., Tomashek, K.M., Wolfe, C.R., Ghazaryan, V., Marconi, V.C., Ruiz-Palacios, G.M., Hsieh, L., Kline, S., et al. (2021). Baricitinib plus remdesivir for hospitalized adults with covid-19. *N. Engl. J. Med.* *384*, 795–807. <https://doi.org/10.1056/NEJMoa2031994>.

- Krishnamurthy, S., Lockey, R.F., and Kolliputi, N. (2021). Soluble ACE2 as a potential therapy for COVID-19. *Am. J. Physiol. Cell Physiol.* 320, C279–C281. <https://doi.org/10.1152/ajpcell.00478.2020>.
- Laucirica, D.R., Schofield, C.J., McLean, S.A., Margaroli, C., Agudelo-Romero, P., Stick, S.M., Tirouvanziam, R., Kicic, A., and Garratt, L.W. Western Australian Epithelial Research Program (WAERP); Australian Respiratory Early Surveillance Team for CF (AREST CF) (2022). *Pseudomonas aeruginosa* modulates neutrophil granule exocytosis in an in vitro model of airway infection. *Immunol. Cell Biol.* 100, 352–370. <https://doi.org/10.1111/imcb.12547>.
- Li, H., Handsaker, B., Wysoker, A., Fennell, T., Ruan, J., Homer, N., Marth, G., Abecasis, G., and Durbin, R.; Genome Project Data Processing Subgroup (2009). The sequence alignment/map format and SAMtools. *Bioinformatics* 25, 2078–2079. <https://doi.org/10.1093/bioinformatics/btp352>.
- Li, M., Zhang, Y., Lu, J., Li, L., Gao, H., Ma, C., Dai, E., and Wei, L. (2021). Asymptomatic COVID-19 individuals tend to establish relatively balanced innate and adaptive immune responses. *Pathogens* 10, 1105. <https://doi.org/10.3390/pathogens10091105>.
- Liao, M., Liu, Y., Yuan, J., Wen, Y., Xu, G., Zhao, J., Cheng, L., Li, J., Wang, X., Wang, F., et al. (2020). Single-cell landscape of bronchoalveolar immune cells in patients with COVID-19. *Nat. Med.* 26, 842–844. <https://doi.org/10.1038/s41591-020-0901-9>.
- Liao, Y., Smyth, G.K., and Shi, W. (2014). featureCounts: an efficient general purpose program for assigning sequence reads to genomic features. *Bioinformatics* 30, 923–930. <https://doi.org/10.1093/bioinformatics/btt656>.
- Love, M.I., Huber, W., and Anders, S. (2014). Moderated estimation of fold change and dispersion for RNA-seq data with DESeq2. *Genome Biol.* 15, 550. <https://doi.org/10.1186/s13059-014-0550-8>.
- Mason, R.J. (2020). Pathogenesis of COVID-19 from a cell biology perspective. *Eur. Respir. J.* 55, 2000607. <https://doi.org/10.1183/13993003.00607-2020>.
- Merad, M., and Martin, J.C. (2020). Pathological inflammation in patients with COVID-19: a key role for monocytes and macrophages. *Nat. Rev. Immunol.* 20, 355–362. <https://doi.org/10.1038/s41577-020-0331-4>.
- Monteil, V., Kwon, H., Prado, P., Hagelkruys, A., Wimmer, R.A., Stahl, M., Leopoldi, A., Garreta, E., Hurtado Del Pozo, C., Prosper, F., et al. (2020). Inhibition of SARS-CoV-2 infections in engineered human tissues using clinical-grade soluble human ACE2. *Cell* 187, 905–913.e7. <https://doi.org/10.1016/j.cell.2020.04.004>.
- Patterson, B.K., Francisco, E.B., Yogendra, R., Long, E., Pise, A., Rodrigues, H., Hall, E., Herrera, M., Parikh, P., Guevara-Coto, J., Triche, T.J., Scott, P., Hekmati, S., Maglinte, D., Chang, X., Mora-Rodriguez, R.A., and Mora, J. (2021). Persistence of SARS CoV-2 S1 protein in CD16+ monocytes in post-acute sequelae of COVID-19 (PASC) up to 15 Months post-infection. *Front. Immunol.* 12, 746021. <https://doi.org/10.3389/fimmu.2021.746021>.
- Perez-Alba, E., Nuzzolo-Shihadeh, L., Aguirre-Garcia, G.M., Espinosa-Mora, J., Lecona-Garcia, J.D., Flores-Perez, R.O., Mendoza-Garza, M., and Camacho-Ortiz, A. (2021). Baricitinib plus dexamethasone compared to dexamethasone for the treatment of severe COVID-19 pneumonia: a retrospective analysis. *J. Microbiol. Immunol. Infect.* 54, 787–793. <https://doi.org/10.1016/j.jmi.2021.05.009>.
- Pontelli, M.C., Castro, I.A., Martins, R.B., Veras, F.P., Serra, L.L., Nascimento, D.C., Cardoso, R.S., Rosales, R., Lima, T.M., Souza, J.P., et al. (2020). Infection of human lymphomononuclear cells by SARS-CoV-2. Preprint at bioRxiv. <https://doi.org/10.1101/2020.07.28.225912>.
- Qin, C., Zhou, L., Hu, Z., Zhang, S., Yang, S., Tao, Y., Xie, C., Ma, K., Shang, K., Wang, W., and Tian, D.S. (2020). Dysregulation of immune response in patients with coronavirus 2019 (COVID-19) in wuhan, China. *Clin. Infect. Dis.* 71, 762–768. <https://doi.org/10.1093/cid/ciaa248>.
- Rao, V.U.S., Arakeri, G., Subash, A., Rao, J., Jadhav, S., Suhail Sayeed, M., Rao, G., and Brennan, P.A. (2020). COVID-19: loss of bridging between innate and adaptive immunity? *Med. Hypotheses* 144, 109861. <https://doi.org/10.1016/j.mehy.2020.109861>.
- Ravindra, N.G., Alfajaro, M.M., Gasque, V., Huston, N.C., Wan, H., Szigeti-Buck, K., Yasumoto, Y., Greaney, A.M., Habet, V., Chow, R.D., et al. (2021). Single-cell longitudinal analysis of SARS-CoV-2 infection in human airway epithelium identifies target cells, alterations in gene expression, and cell state changes. *PLoS Biol.* 19, e3001143. <https://doi.org/10.1371/journal.pbio.3001143>.
- Schulte-Schrepping, J., Reusch, N., Paclik, D., Baßler, K., Schlickeiser, S., Zhang, B., Kramer, B., Kramer, T., Brumhard, S., Bonaguro, L., et al. (2020). Severe COVID-19 is marked by a dysregulated myeloid cell compartment. *Cell* 182, 1419–1440.e23. <https://doi.org/10.1016/j.cell.2020.08.001>.
- Sefik, E., Qu, R., Junqueira, C., Kaffe, E., Mirza, H., Zhao, J., Brewer, J.R., Han, A., Steach, H.R., Israelow, B., et al. (2022). Inflammatory activation in infected macrophages drives COVID-19 pathology. Preprint at bioRxiv. <https://doi.org/10.1101/2021.09.27.461948>.
- Siren, J., Valimaki, N., and Makinen, V. (2014). Indexing graphs for path queries with applications in genome research. *IEEE/ACM Trans Comput. Biol. Bioinform.* 11, 375–388. <https://doi.org/10.1109/TCBB.2013.2297101>.
- Stebbing, J., Krishnan, V., de Bono, S., Ottaviani, S., Casalini, G., Richardson, P.J., Monteil, V., Lauschke, V.M., Mirzazimi, A., Youhanna, S., et al. (2020). Mechanism of baricitinib supports artificial intelligence-predicted testing in COVID-19 patients. *EMBO Mol. Med.* 12, e12697. <https://doi.org/10.15252/emmm.202012697>.
- Stuart, T., Butler, A., Hoffman, P., Hafemeister, C., Papalexi, E., Mauck, W.M., 3rd, Hao, Y., Stoerckius, M., Smibert, P., and Satija, R. (2019). Comprehensive integration of single-cell data. *Cell* 177, 1888–1902.e21. <https://doi.org/10.1016/j.cell.2019.05.031>.
- Tan, M., Liu, Y., Zhou, R., Deng, X., Li, F., Liang, K., and Shi, Y. (2020). Immunopathological characteristics of coronavirus disease 2019 cases in Guangzhou, China. *Immunology* 160, 261–268. <https://doi.org/10.1111/imm.13223>.
- Tang, D., Comish, P., and Kang, R. (2020). The hallmarks of COVID-19 disease. *PLoS Pathog.* 16, e1008536. <https://doi.org/10.1371/journal.ppat.1008536>.
- Tay, M.Z., Poh, C.M., Renia, L., MacAry, P.A., and Ng, L.F.P. (2020). The trinity of COVID-19: immunity, inflammation and intervention. *Nat. Rev. Immunol.* 20, 363–374. <https://doi.org/10.1038/s41577-020-0311-8>.
- Vanderheiden, A., Ralfs, P., Chirkova, T., Upadhyay, A.A., Zimmerman, M.G., Bedoya, S., Aoued, H., Tharp, G.M., Pellegrini, K.L., Manfredi, C., et al. (2020). Type I and type III interferons restrict SARS-CoV-2 infection of human airway epithelial cultures. *J. Virol.* 94. <https://doi.org/10.1128/JVI.00985-20>.
- Wang, G., Yang, M.L., Duan, Z.L., Liu, F.L., Jin, L., Long, C.B., Zhang, M., Tang, X.P., Xu, L., Li, Y.C., et al. (2021). Dalbavancin binds ACE2 to block its interaction with SARS-CoV-2 spike protein and is effective in inhibiting SARS-CoV-2 infection in animal models. *Cell Res.* 31, 17–24. <https://doi.org/10.1038/s41422-020-00450-0>.
- Weston, S., and Frieman, M.B. (2020). COVID-19: knowns, unknowns, and questions. *mSphere* 5, e00203–e00220. <https://doi.org/10.1128/mSphere.00203-20>.
- Zhang, B., Zhou, X., Zhu, C., Song, Y., Feng, F., Qiu, Y., Feng, J., Jia, Q., Song, Q., Zhu, B., and Wang, J. (2020). Immune phenotyping based on the neutrophil-to-lymphocyte ratio and IgG level predicts disease severity and outcome for patients with COVID-19. *Front. Mol. Biosci.* 7, 157. <https://doi.org/10.3389/fmolb.2020.00157>.
- Zhou, Z., Ren, L., Zhang, L., Zhong, J., Xiao, Y., Jia, Z., Guo, L., Yang, J., Wang, C., Jiang, S., et al. (2020). Heightened innate immune responses in the respiratory tract of COVID-19 patients. *Cell Host. Microbe* 27, 883–890.e2. <https://doi.org/10.1016/j.chom.2020.04.017>.
- Zuniga, E.I., Macal, M., Lewis, G.M., and Harker, J.A. (2015). Innate and adaptive immune regulation during chronic viral infections. *Annu. Rev. Virol.* 2, 573–597. <https://doi.org/10.1146/annurev-virology-100114-055226>.

## STAR★METHODS

### KEY RESOURCES TABLE

| REAGENT or RESOURCE                                        | SOURCE                                                        | IDENTIFIER                    |
|------------------------------------------------------------|---------------------------------------------------------------|-------------------------------|
| <b>Antibodies</b>                                          |                                                               |                               |
| ACE2                                                       | R&D Systems                                                   | RRID: AB_2305177; BAF933      |
| CD45 biotin                                                | Biologend                                                     | RRID: AB_314392; 304004       |
| CD115 Biotin                                               | Biologend                                                     | RRID: AB_2650968; 347314      |
| <b>Bacterial and virus strains</b>                         |                                                               |                               |
| OC43                                                       | ATCC                                                          | Betacoronavirus 1 Strain OC43 |
| IAV                                                        | ATCC                                                          | IAV A/PR/8/34                 |
| SARS-CoV-2                                                 | BEI Resources                                                 | Isolate USA-WA1/2020          |
| <b>Biological samples</b>                                  |                                                               |                               |
| Blood                                                      | Blood was drawn by a trained phlebotomist from healthy donors | N/A                           |
| <b>Chemicals, peptides, and recombinant proteins</b>       |                                                               |                               |
| Dynasore                                                   | Selleckchem                                                   | S8047                         |
| Tripure                                                    | Millipore Sigma                                               | 11667165001                   |
| Recombinant Human ACE-2                                    | R&D Systems                                                   | 933-ZN                        |
| Leukotriene B <sub>4</sub> (LTB <sub>4</sub> )             | Millipore Sigma                                               | Cat#L0517-10UG                |
| CCL2                                                       | Biologend                                                     | 571402                        |
| Dalbavancin                                                | Selleckchem                                                   | S4848                         |
| Pitstop2                                                   | Selleckchem                                                   | S9670                         |
| <b>Critical commercial assays</b>                          |                                                               |                               |
| Mesoscale U-PLEX Biomarker Group 1 (hu) Assays             | MSD                                                           | Kit Catalog Numer: K15067L-1  |
| RealTime-Glo™ Extracellular ATP Assay                      | Promega                                                       | GA5010                        |
| <b>Deposited data</b>                                      |                                                               |                               |
| RNA-seq                                                    | GEO                                                           | GSE186460                     |
| scRNAseq                                                   | <a href="#">Liao et al., 2020</a> ; GEO                       | GSE145926                     |
| <b>Experimental models: Cell lines</b>                     |                                                               |                               |
| NCI-H441                                                   | ATCC                                                          | RRID: CVCL_1561; HTB-174      |
| <b>Oligonucleotides</b>                                    |                                                               |                               |
| Primers                                                    | IDT                                                           | <a href="#">Table S9</a>      |
| gBlocks                                                    | IDT                                                           | <a href="#">Table S10</a>     |
| <b>Software and algorithms</b>                             |                                                               |                               |
| SAMtools                                                   | <a href="#">Danecek et al., 2021</a>                          | N/A                           |
| FeatureCounts                                              | <a href="#">Liao et al., 2014</a>                             | N/A                           |
| DESeq2                                                     | <a href="#">Love et al., 2014</a>                             | N/A                           |
| HISAT2                                                     | <a href="#">Siren et al., 2014</a>                            | N/A                           |
| <b>Other</b>                                               |                                                               |                               |
| Streptavidin Coated Magnetic Particles 1.0% w/v 8.0–9.9 μm | Spherotech                                                    | SVM-80-5                      |

### RESOURCE AVAILABILITY

#### Lead contact

Requests for further information should be directed to and will be fulfilled by the lead contact, Rabindra Tirouvanziam ([tirouvanziam@emory.edu](mailto:tirouvanziam@emory.edu)).

### Materials availability

This study did not generate new unique reagents.

### Data and code availability

- RNA-seq data has been deposited at Gene Expression Omnibus (GEO) and are publicly available as of the date of publication. It can be accessed under accession: GEO: GSE186460 with full link here: <https://www.ncbi.nlm.nih.gov/geo/query/acc.cgi?acc=GSE186460>.

This paper analyzes existing, publicly available scRNA-seq data (Liao et al., 2020) and can be accessed from the GEO database under accession code GEO: GSE145926 with full link here: <https://www.ncbi.nlm.nih.gov/geo/query/acc.cgi?acc=GSE145926>.

- This paper does not report original code.
- Any additional information required to reanalyze the data reported in this paper is available from the [lead contact](#) upon request.

## EXPERIMENTAL MODEL AND SUBJECT DETAILS

### Maintenance of submerged H441 Club cells

The H441 Club cell line was acquired from ATCC and grown in 50/50 DMEM/F12 supplemented with 1% v/v penicillin/streptomycin and 10% FBS.

### In vitro transmigration experiments and infection with virus

The H441 Club cell line is grown on Alvetex scaffolds (ReproCELL, Glasgow, UK) coated with rat-tail collagen (Sigma) for 2 weeks at air liquid interface with 2% v/v Ultrosor G (Crescent Chemical, Islandia, NY) in 50/50 DMEM/F12 supplemented with 1% v/v penicillin/streptomycin (Forrest et al., 2018; Grunwell et al., 2019). The filters are then flipped and placed into fresh media in the bottom of the well. Virus (PR8: A/Puerto Rico/8/1934; OC43; or NR-52281, SARS-CoV-2 Isolate USA-WA1/2020) is added to the media such that the multiplicity of infection (MOI) is 0.1 and incubated for 24 h (unless otherwise indicated) (Figure 1A). This setup requires manual flipping of filters prior to transmigration (Dobosh et al., 2021), a delicate process to perform in BSL3 conditions. Thus, the epithelial cells must be infected while the cells are submerged and no longer at ALI, which may introduce artifacts reminiscent of pneumonia. The filters are transferred to RPMI media with LTB4 (100 nM) and CCL2 (250 pg/mL) with or without additional drugs. Baricitinib and remdesivir were each used at a final concentration of 1  $\mu$ M. The untreated condition contained 0.1% v/v DMSO as a vehicle control. Blood was collected by venipuncture in K2-EDTA tubes from healthy donor and monocytes were purified using RosetteSep (StemCell) as described previously (Ford et al., 2021). A total of  $10^6$  cells is loaded onto the Alvetex scaffold for transmigration which was allowed to occur for 24 h (Figure 3A). After transmigration, TriPure (Roche) was added to epithelial cells and frozen at  $-80^{\circ}\text{C}$ .

## METHOD DETAILS

### Isolation of monocytes from transmigration fluid

To purify transmigrated cells in a low volume-manner and without the use of a centrifuge, we conjugated 8  $\mu$ m magnetic beads coated in streptavidin (Spherotech) with biotinylated antibodies targeting CD45 and CD115. Beads and cells were incubated at room temperature for 15 min and the supernatant was removed. The bead precipitate was resuspended in TriPure and frozen at  $-80^{\circ}\text{C}$ .

### Isolation of nucleic acids

For isolation of RNA (and DNA) from epithelial cells, after thawing, chloroform (Sigma) was added to the TriPure and RNA was extracted using the standard purification procedure in the manufacturer's protocol followed by a sodium acetate precipitation to further clean the RNA. For isolation of RNA (and DNA) from monocytes, the tubes were thawed and placed on a magnet to remove the beads from solution. The TriPure supernatant was transferred to a clean tube and chloroform was added and spun following the manufacturer's protocol. Due to the small amount of expected RNA yield, the aqueous phase (containing the RNA) was mixed 1:1 with 100% ethanol (Sigma) and loaded onto an RNA clean and concentrator-5 column (Zymo). RNA was isolated following the manufacturer's protocol. DNA was isolated from the organic phase following the manufacturer's protocol.

### Cell counting by DNA quantification

Traditional cell counting by hemocytometer was not available in the BSL3. To solve this problem, an estimate of cell number was achieved by quantifying the amount of DNA in the sample. The extracted genomic DNA is amplified using a primer and probe pair which bind an exon-intron junction of AP endonuclease 1 (APEX1; Table S9). These sequences appear once in the genome and the primers and probe do not exhibit off-target amplification. Luna Universal Probe qPCR Master Mix (New England Biolabs) was used to amplify the gDNA. A standard curve to calculate copy number was generated using a double stranded gBlock from IDT which contains the expected binding sequence (Table S10). The copy number was then divided by two to account for diploidy and multiplied by the dilution factor to estimate the total number of cells. Naturally, this number is an estimate as dividing cells as well as dead cells, which have not yet fully degraded their DNA, will elevate the count resulting in an overestimate of the total cell yield.

### Flow cytometric analysis of monocytes

Purified blood monocytes from blood before and after transmigration across HLE-ALI cells with or without infection with SARS-CoV-2 were stained (R&D Systems) for the presence of surface ACE2 and then measured by flow cytometry on a Cytoflex S (Beckman Coulter).

### Extracellular ATP assay

100  $\mu$ L of extracellular fluid was centrifuged at 800 xg for 10 min and then used with the Promega Realtime-Glo Extracellular ATP Assay following the manufacturer's instructions. Luminescence was measured on a SpectraMax iD3 (Molecular Devices).

### Quantification of viral RNA via qRT-PCR

Total RNA is reverse-transcribed using SuperScript IV (ThermoFisher) and an anchored oligo-d(T)<sub>20</sub> primer followed by amplification with a primer probe pair which targets the N gene (Table S9) and Luna Universal Probe qPCR Master Mix (New England Biolabs) was used to amplify the cDNA. A standard curve to calculate copy number was also generated using a double stranded gBlock from IDT which contains the expected binding sequence (Table S10).

### qRT-PCR

RNA is reverse-transcribed using SuperScript IV and anchored oligo-d(T)<sub>20</sub> primers to make a cDNA library that can be used multiple times. cDNA is amplified using relevant primer pairs (Table S9) and SYBR Green in an Applied Biosystems 7500. Data are analyzed via the ddCt method for 18S rRNA and GAPDH (reference controls).

### RNA quantification and quality control

RNA was initially quantified by Nanodrop 1000 spectrophotometer (ThermoScientific). For samples that would be analyzed by RNA-seq, an aliquot was further quality controlled by an Agilent Bioanalyzer 2100.

### Transcriptomic analysis of monocytes

Isolated RNA was reverse transcribed using Superscript IV Reverse Transcriptase (ThermoFisher Scientific) and an anchored oligo-d(T)<sub>20</sub> primer following the manufacturer's protocol. A Fluidigm Biomark machine and Delta Gene Assay chip (96  $\times$  96) was used to conduct multiplexed qPCR of 96 genes and 96 samples. Data was analyzed using a modified version of the jpouch script available in GitHub (<https://github.com/jpouch/qPCR-Biomark>; Date of Access: May 31<sup>st</sup>, 2020).

### RNA-sequencing of epithelial cells

For RNA-seq, purified RNA was given to the Yerkes Genomics Core for processing. Briefly, rRNA is depleted and the TruSeqRNA Sample Preparation v2 kit and LS protocol is used. All the produced Fastq files from single end reads were aligned to the human reference genome (GRCh38.p13- Ensembl) using the alignment tool HISAT2 (version 2.1.0), using the default settings (Siren et al., 2014). Then, BAM files reads were sorted using SAMtools (Li et al., 2009). The resulting BAM files were used as input to determine read counts using FeatureCounts (1.5.2) (Liao et al., 2014). All processed counts were used to conducted differential expression analysis using DESeq2 (Love et al., 2014), considering as differentially expressed genes, genes with fold changes >2 folds, and a False discovery rate <0.1. Finally, to understand the functions of the differentially expressed genes Metacore server is used against pathway maps and networks. RNA-seq data has been deposited at GEO and are available as of the date of publication. It can be accessed under accession: GEO: GSE186460.

### Protein extraction

Once the DNA was removed from the organic phase, the supernatant was mixed 1:1 with 1% v/v SDS and loaded onto a 3,000 kDa MWCO column (Sartorius) and spun at 3,000 xg for 2 min. The column was buffer exchanged with 500  $\mu$ L of 1% v/v SDS five times.

### Quantification of inflammatory mediators

Ten mediators (CXCL8, G-CSF, GM-CSF, IFN $\gamma$ , IL-1 $\alpha$ , IL1 $\beta$ , IL-6, IL-10, IL-18, TNF $\alpha$ ) were measured using a chemiluminescent assay according to the manufacturer's protocol (U-plex; Meso Scale Diagnostics). In general, to measure CXCL8, samples had to be diluted 1:10, but for all other cytokines we did not need to dilute the samples.

### Single-cell RNA sequencing

The scRNA-seq FASTQs data from BALF of mild and severe patients were acquired from the GEO database under accession code GEO: GSE145926 (Liao et al., 2020): <https://www.ncbi.nlm.nih.gov/geo/query/acc.cgi?acc=GSE145926>. The Cell Ranger Software (v.3.1.0) was used to perform barcode processing and single-cell 5' unique molecular identifier (UMI) counting. To detect SARS-CoV-2 reads, a customized reference was built by integrating human GRCh38 and SARS-CoV-2 genome (severe acute respiratory syndrome coronavirus 2 isolate Wuhan-Hu-1, complete genome, GenBank MN908947.3). Specifically, splicing-aware aligner STAR (Dobin et al., 2013) was used in FASTQs alignment. Cell barcodes were then determined based on the distribution of UMI counts automatically. The filtered gene-barcode matrices were first normalized using 'LogNormalize' methods in Seurat v.3 (Stuart



et al., 2019) with default parameters. The top 2,000 variable genes were then identified using the 'vst' method by the FindVariableFeatures function. To remove the batch effect between the mild and severe datasets, the standard integration workflow of Seurat v.3 was used with the first 30 dimensions from canonical correlation analysis as the input of the 'FindTransferAnchors()' function. PCA was performed using the top 2,000 variable genes of the integrated matrix. Then UMAP was performed on the top 30 principal components for visualizing the cells. Meanwhile, graph-based clustering was performed on the PCA-reduced data for clustering analysis with Seurat v.3. The resolution was set to 0.8 to obtain the UMAP.

#### QUANTIFICATION AND STATISTICAL ANALYSIS

All statistics were calculated using GraphPad Prism 9.2.0. Details of each test number of including the n, where n is the independent biological replicates, plotted data always indicate the median with the interquartile range, as well as threshold cutoffs for statistical significance are indicated in the legends accompanying the figures.

**Supplemental information**

**Baricitinib attenuates the proinflammatory phase  
of COVID-19 driven by lung-infiltrating monocytes**

**Brian Dobosh, Keivan Zandi, Diego Moncada Giraldo, Shu Ling Goh, Kathryn Musall, Milagros Aldeco, Julia LeCher, Vincent D. Giacalone, Junkai Yang, Devon J. Eddins, Manoj Bhasin, Eliver Ghosn, Vikas Sukhatme, Raymond F. Schinazi, and Rabindra Tirouvanziam**

A

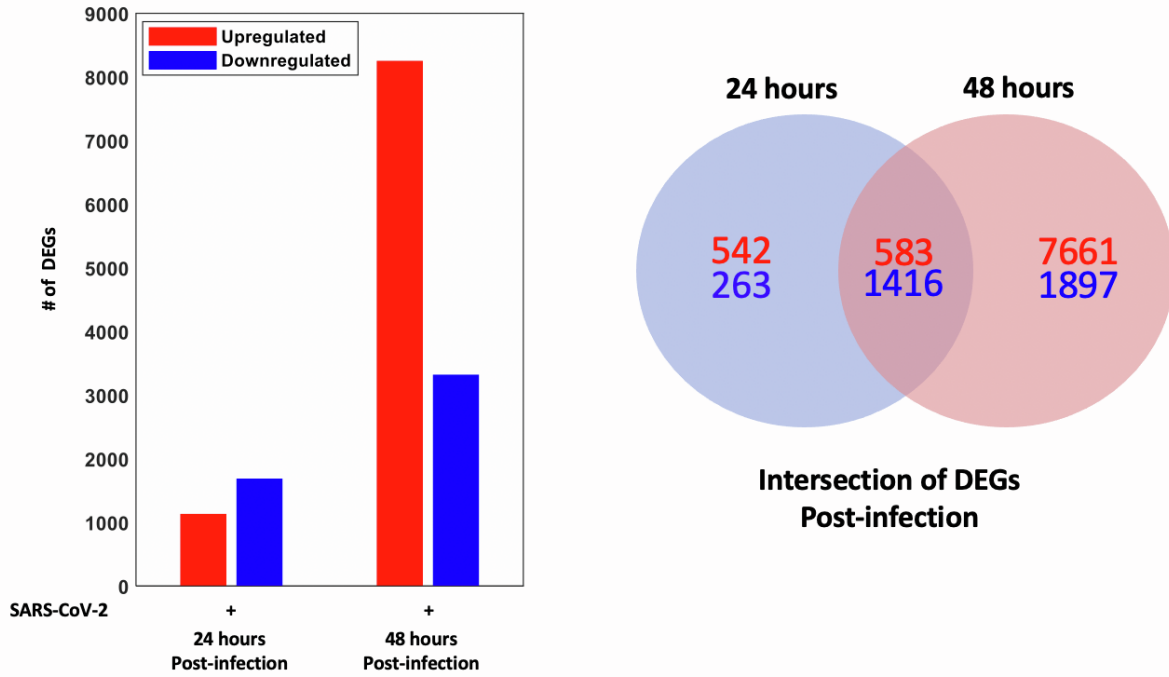

B

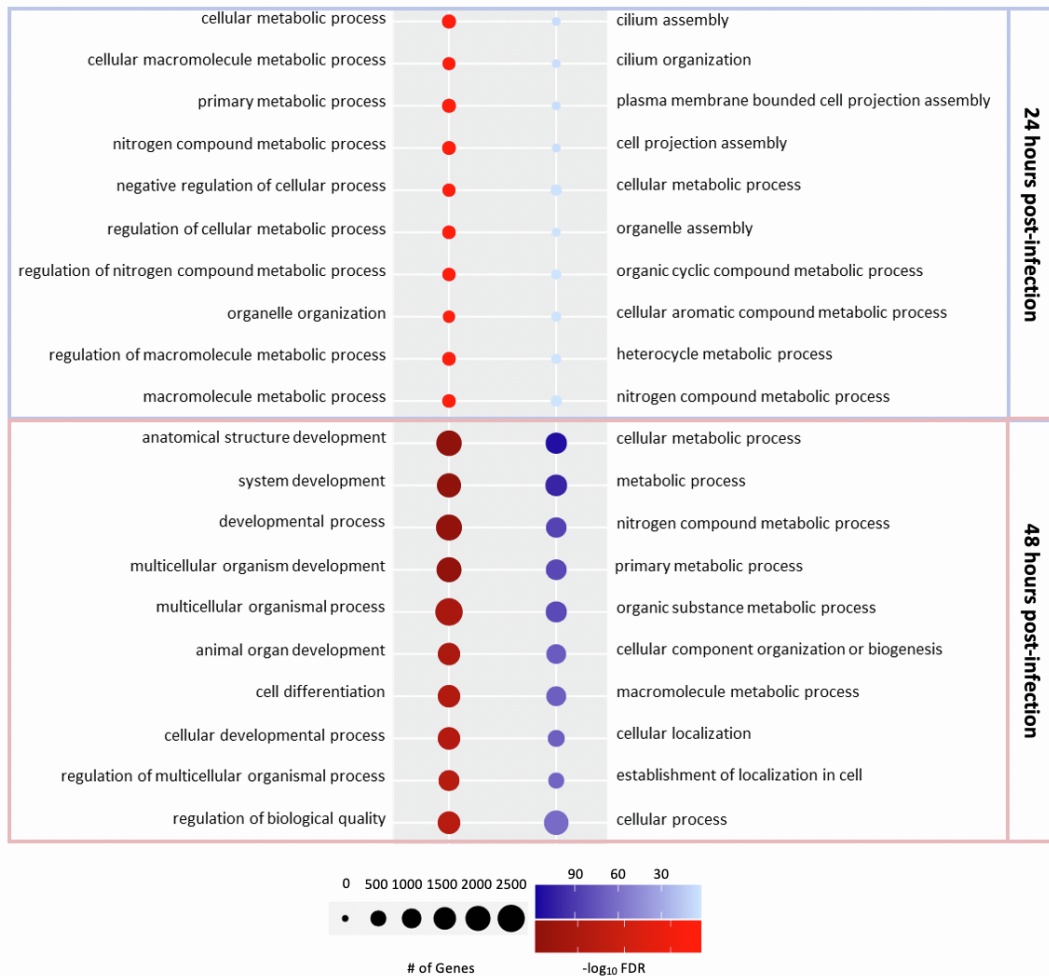

**Supplementary Figure 1. Related to Figure 2. (A)** Number of upregulated and downregulated DEGs from the RNA-seq data (n=3 biological replicates) of HLE-ALI cells infected with SARS-CoV-2 for either 24 or 48 hrs. **(B)** GO processes enriched in HLE-ALI cells at either 24 or 48 hrs post-infection with SARS-CoV-2. GO terms were generated using uniquely DEGs between the two conditions.

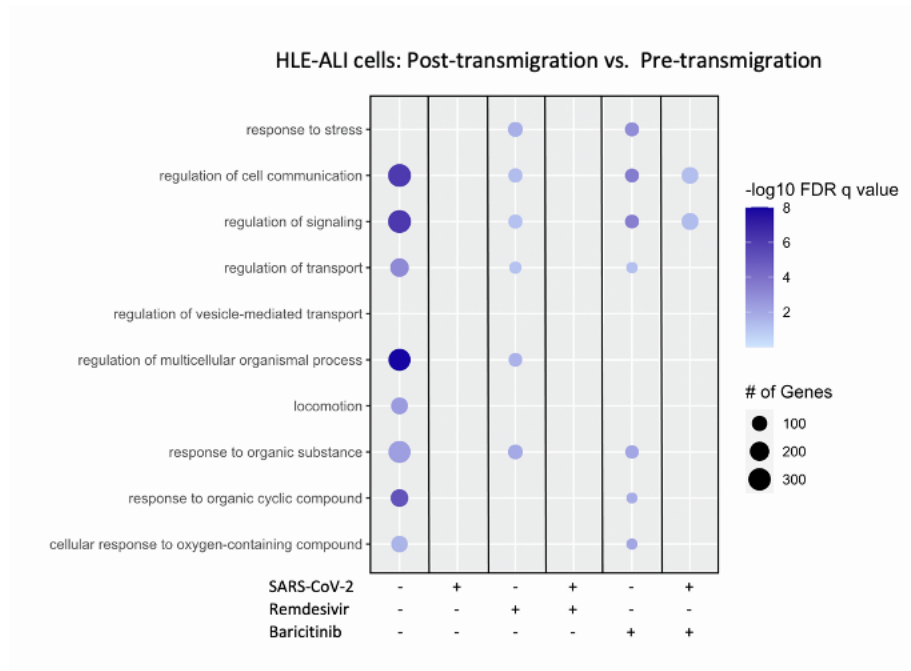

**Supplementary Figure 2. Related to Figure 3.** Enriched GO terms related to HLE-ALI cells pre- and post- transmigration under each drug and infection condition (n=3 biological replicates).

A

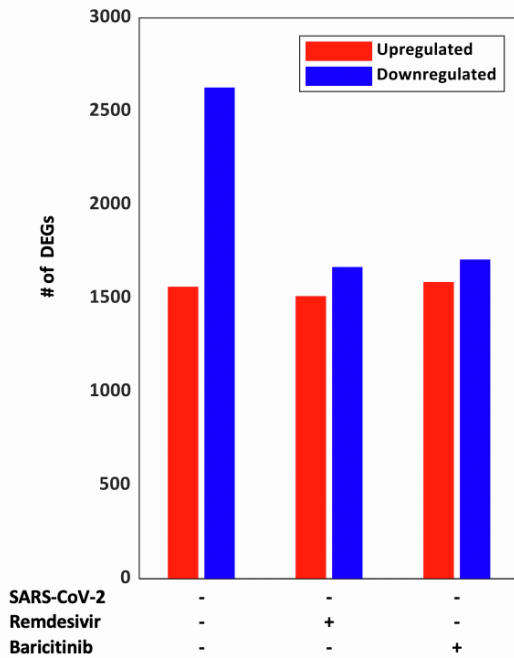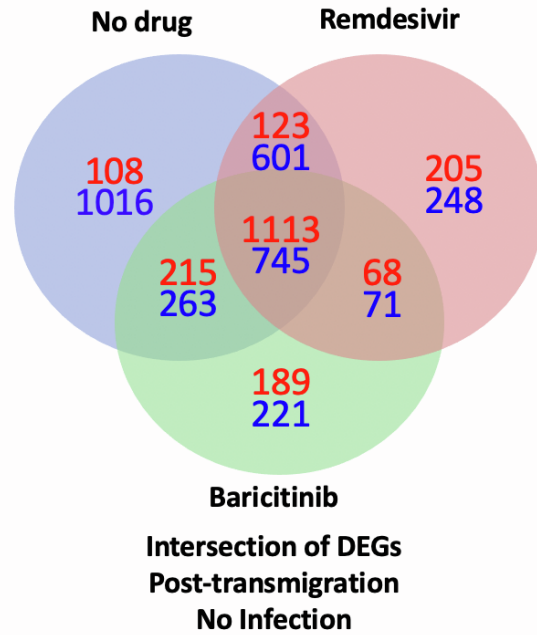

B

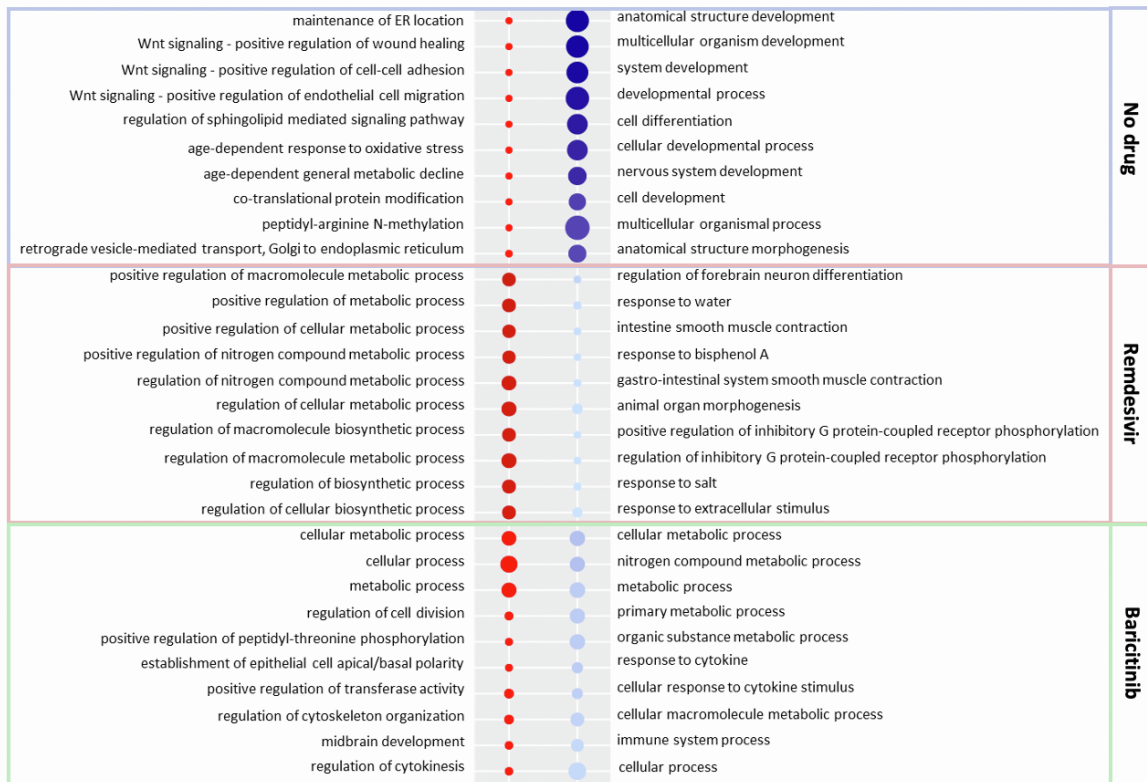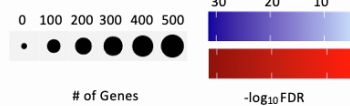

**Supplementary Figure 3. Related to Figure 3. (A)** Number of upregulated and downregulated DEGs in the RNA-seq data obtained from uninfected HLE-ALI cells after transmigration of monocytes in the presence of either vehicle, remdesivir, or baricitinib (n=3 biological replicates). **(B)** GO processes enriched in uninfected HLE-ALI cells after transmigration of monocytes in the presence of either vehicle, remdesivir, or baricitinib. GO terms were generated using uniquely DEGs between the three conditions.

A

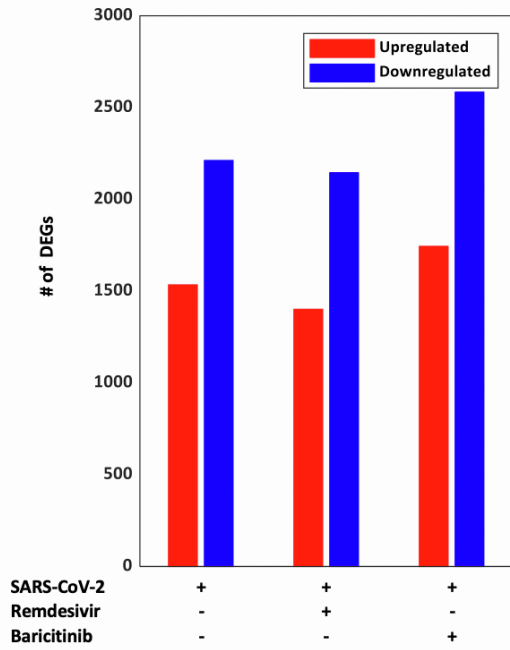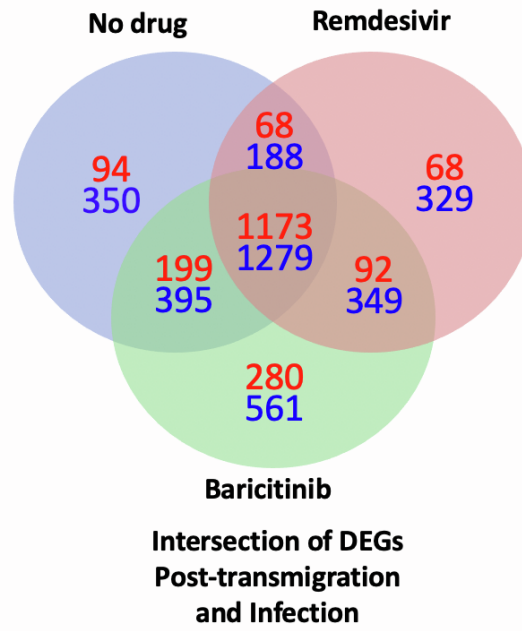

B

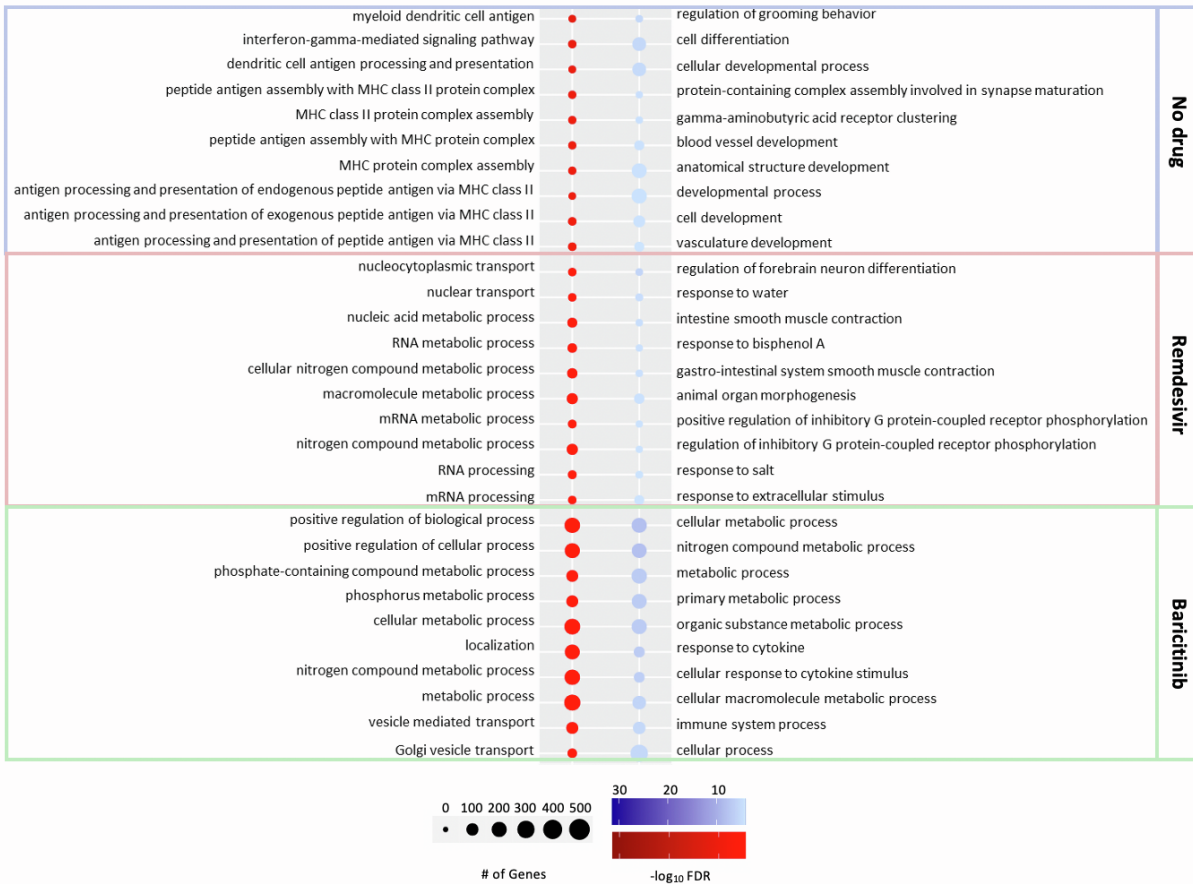



**Supplementary Figure 4. Related to Figure 3.**(A) Number of upregulated and downregulated DEGs in the RNA-seq data obtained from SARS-CoV-2-infected HLE-ALI cells after transmigration of monocytes in the presence of either vehicle, remdesivir, or baricitinib (n=3 biological replicates). (B) GO processes enriched in SARS-CoV-2-infected HLE-ALI cells after transmigration of monocytes in the presence of either vehicle, remdesivir, or baricitinib. GO terms were generated using uniquely DEGs between the three conditions.

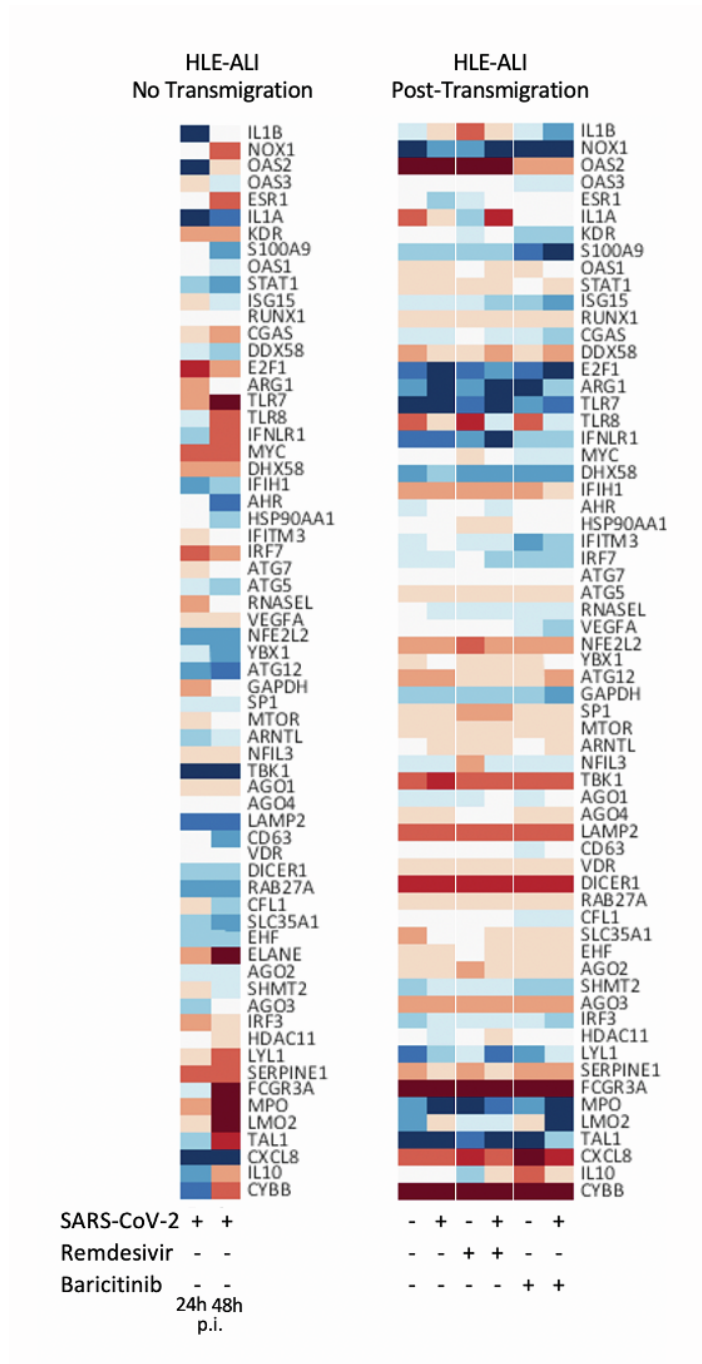

**Supplementary Figure 5. Related to Figure 3.** Normalized expression values of a set of genes extracted from the RNA-seq data of HLE-ALI cells under each treatment condition (n=3 biological replicates). The set of genes was selected to be the same as the genes selected for qRT-PCR of the monocytes in **Figure 3B**. If a gene was not identified in the RNA-seq data of HLE-ALI cells, it was not listed here.

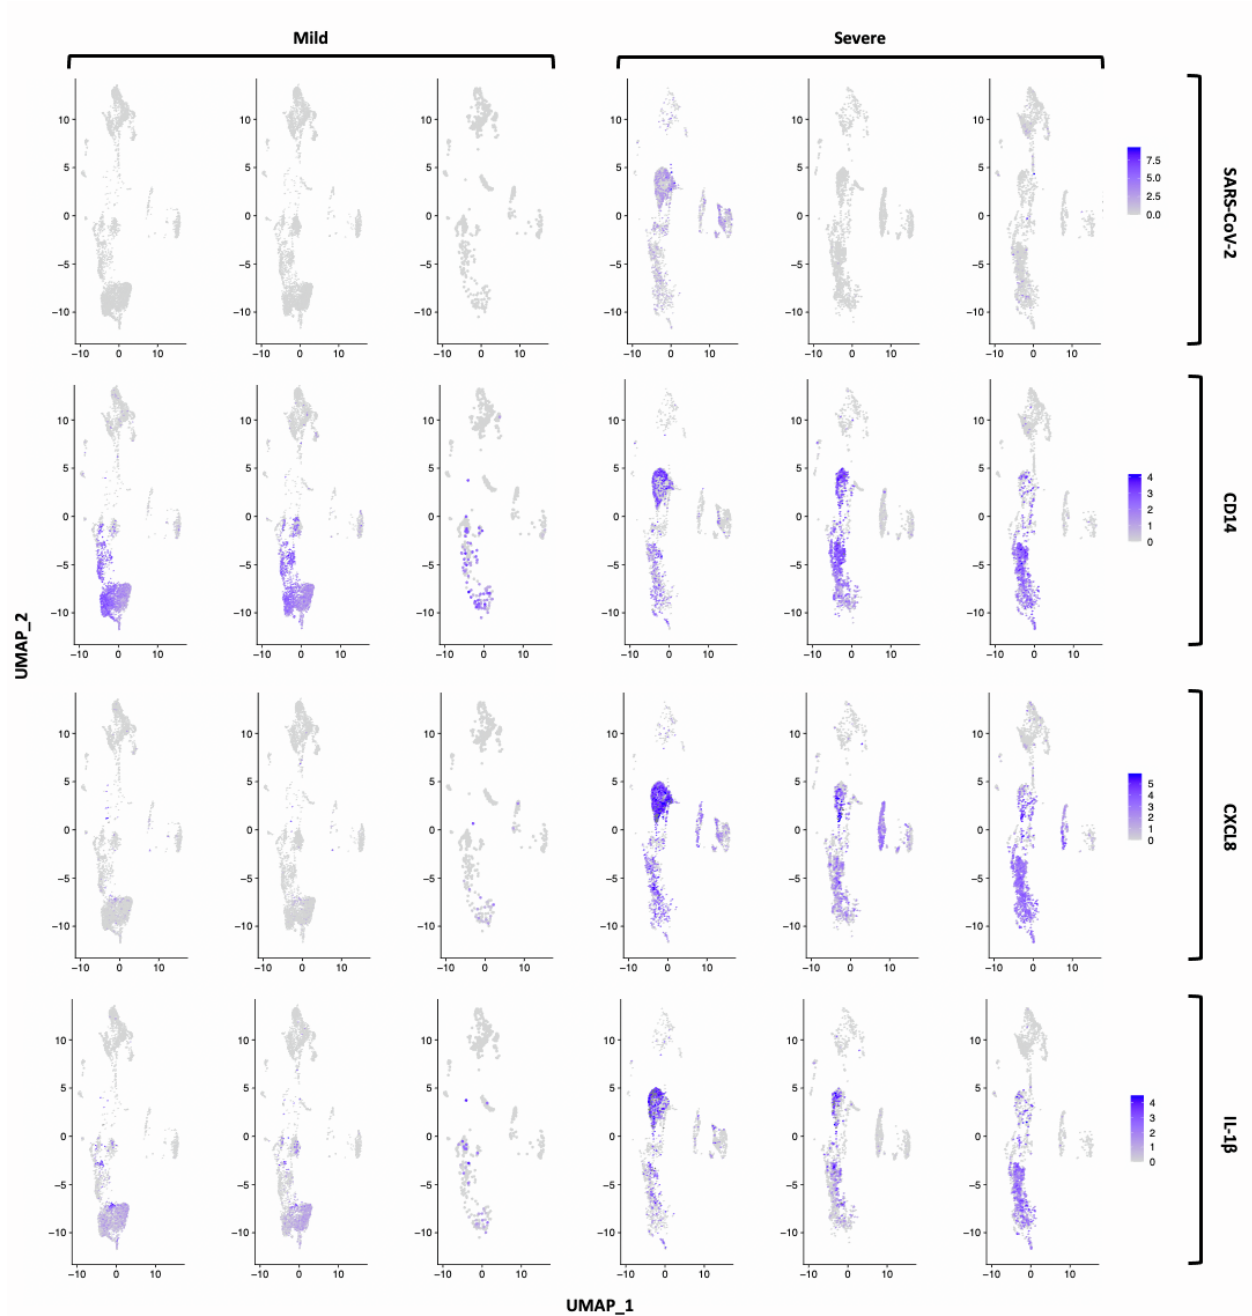

**Supplementary Figure 6. Related to Figure 4.** Individual UMAPs of scRNA-seq data of BALF from six patients hospitalized with either mild (n=3) or severe (n=3) COVID-19. Original scRNA-seq data is publicly available under accession code GSE145926 (Liao et al., 2020).

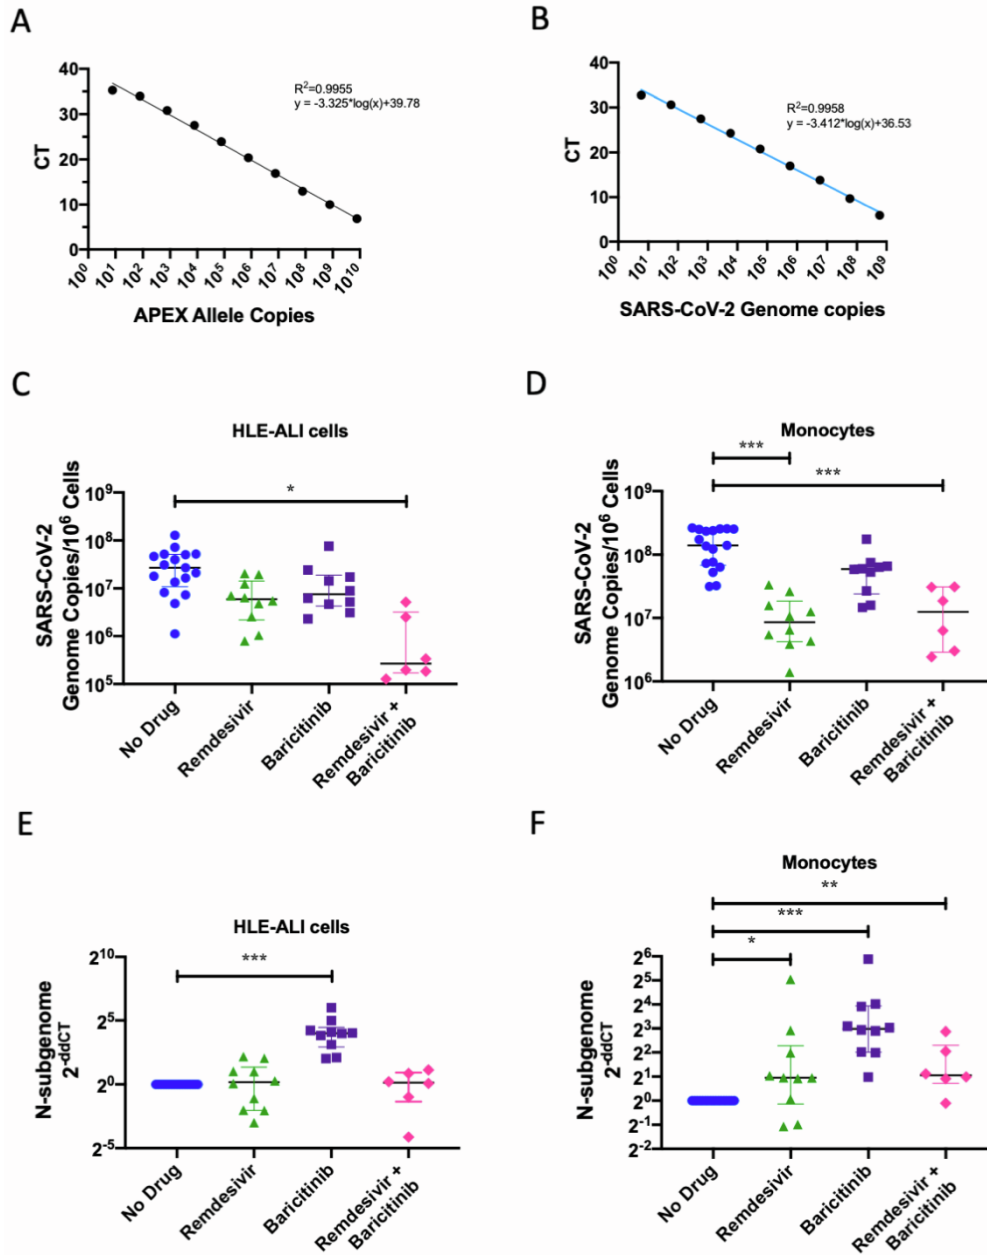

**Supplementary Figure 7. Related to Figure 5. SARS-CoV-2 genome copies in each compartment relative to cell number and N-subgenome calculations. (A)** In order to calculate cell number a standard curve was used to estimate the number of alleles of APEX present (see Supplementary Tables 9 and 10). This number was transformed by the following calculation to obtain an estimate for cell number: (calculated gene copies) /  $2^{\text{dilution factor}}$  (B) A standard curve was generated to calculate the total number of SARS-CoV-2 genome copies

**(see Supplementary Tables 9 and 10).** **(C, D)** Calculated SARS-CoV-2 genome copies in each cell was normalized by dividing by the number of cells present. **(E)** Primers aligning to the N-subgenome were used to quantify the replication competency of the virus. Data were normalized using the delta delta Ct method to 18S rRNA **(see Supplementary Tables 9 and 10)** (n=17 for the no drug condition, n=10 for the baricitinib and remdesivir alone conditions, and n=6 for the combined baricitinib and remdesivir conditions). All statistics were calculated using the Mann-Whitney U-test in Prism. \* p<0.05, \*\* p<0.01, \*\*\*p<0.001.

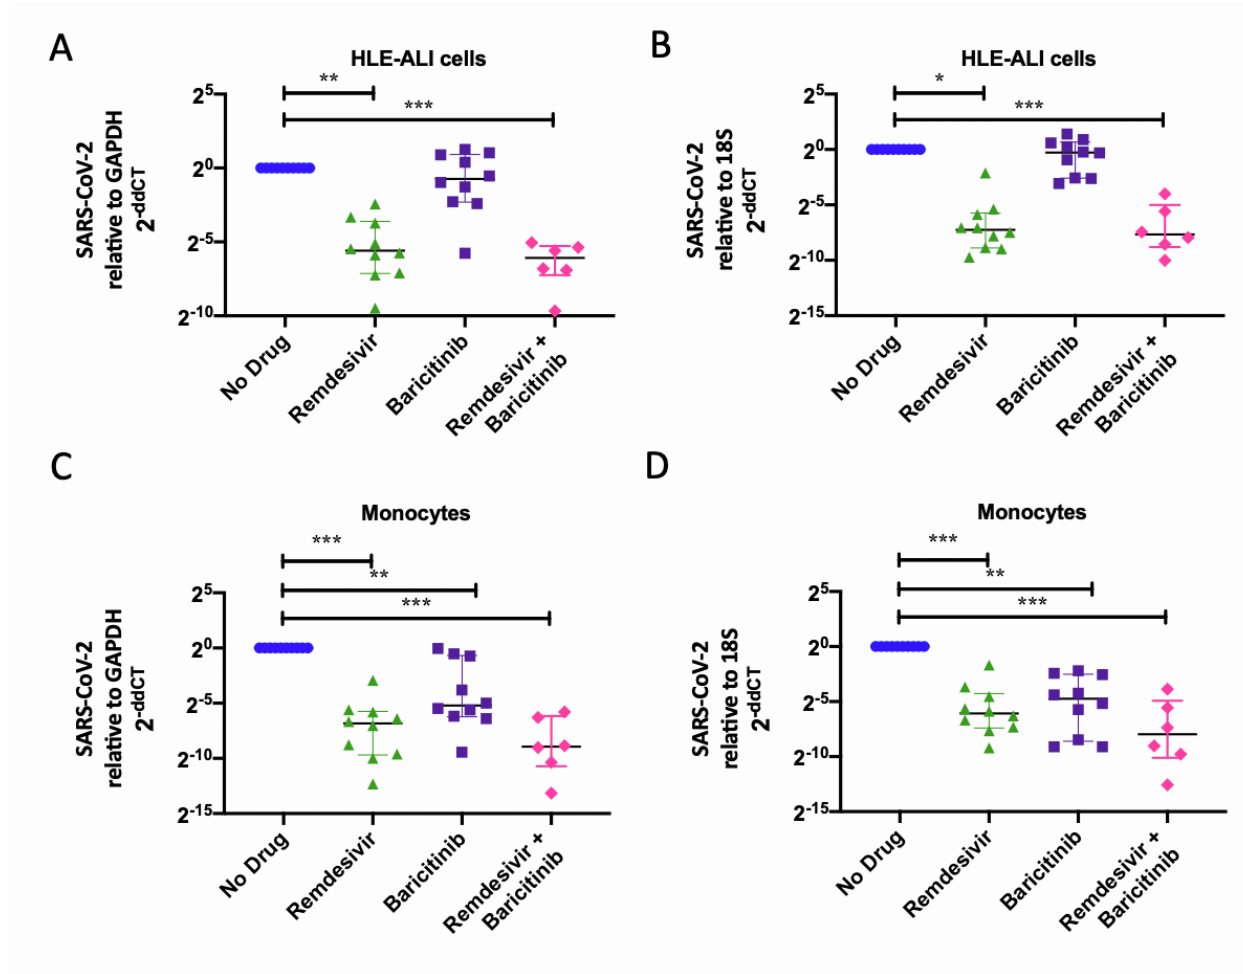

**Supplementary Figure 8. Related to Figure 5. (A-D)** Calculated SARS-CoV-2 genome copies in each condition was normalized to either GAPDH (A, C) or 18S rRNA (B, D) in HLE-ALI cells (A, B) or monocytes (C, D) using the delta delta Ct method (see Supplementary Tables 9 and 10) (n=10 for the no drug condition and the baricitinib and remdesivir alone conditions, and n=6 for the combined baricitinib and remdesivir conditions). All statistics were calculated using the Mann-Whitney U-test in Prism. \* p<0.05, \*\* p<0.01, \*\*\*p<0.001.

**A**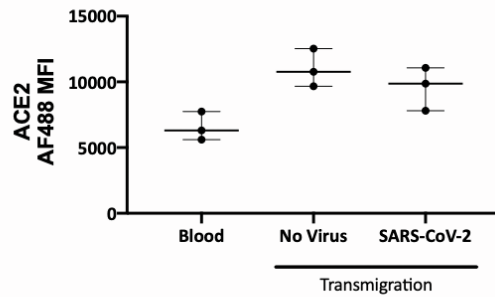**B**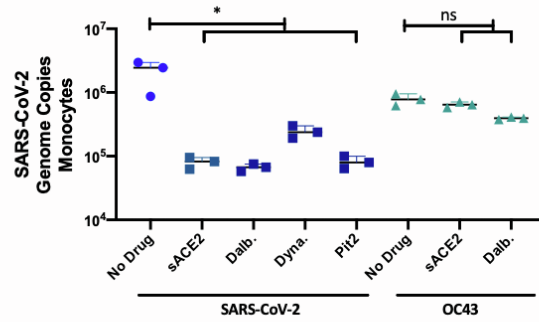

**Supplementary Figure 9. Related to Figure 5. (A)** Purified blood monocytes before and after transmigration across HLE-ALI cells with or without infection with SARS-CoV-2 were stained for the presence of surface ACE2 and then analyzed by flow cytometry (n=3 biological replicates). **(B)** Monocytes were transmigrated across HLE-ALI cells infected with either SARS-CoV-2 or OC43. In the apical fluid were soluble ACE2 (200 µg/mL), dalbavancin (1 µM), dynasore (80 µM) or pitstop2 (15 µM) (n=3 biological replicates). Statistics were calculated using a Mann-Whitney U-test in Prism. \* p<0.05, \*\* p<0.01, \*\*\*p<0.001.

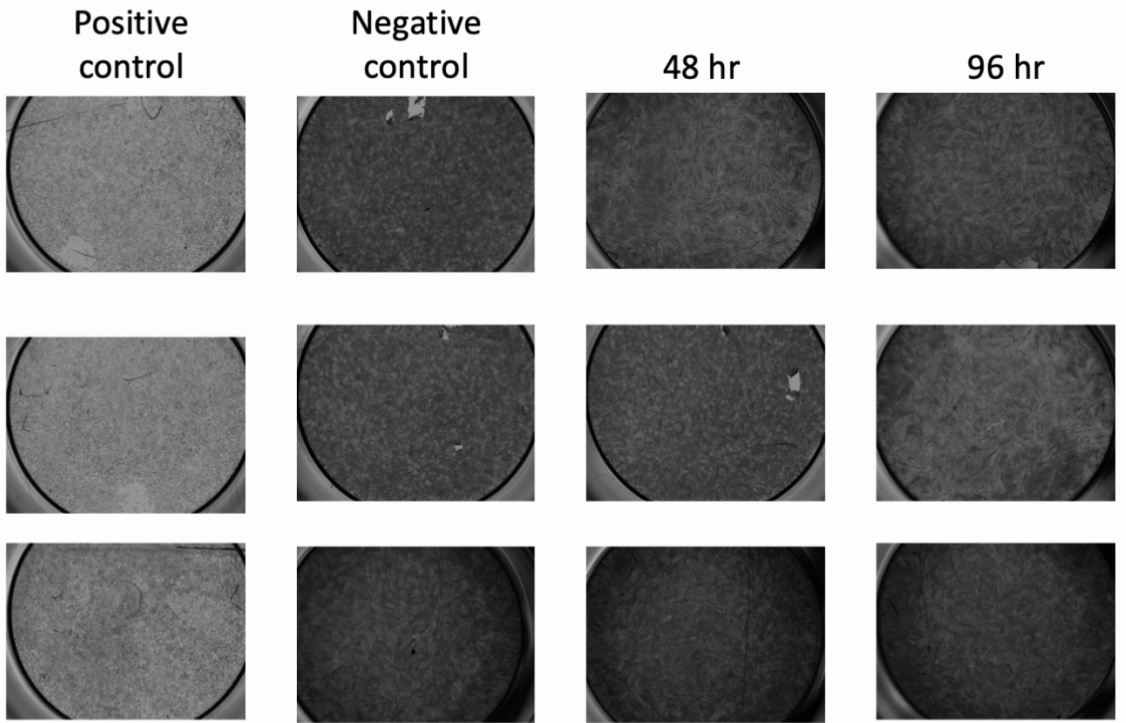

**Supplementary Figure 10. Related to Figure 6.** Extracellular fluid from cultures of SARS-CoV-2 infected transmigrated monocytes was layered onto VeroE6 cells to perform a plaque assay. The positive control was the direct application of  $2.5 \times 10^4$  genome copies of SARS-CoV-2 to the cells.



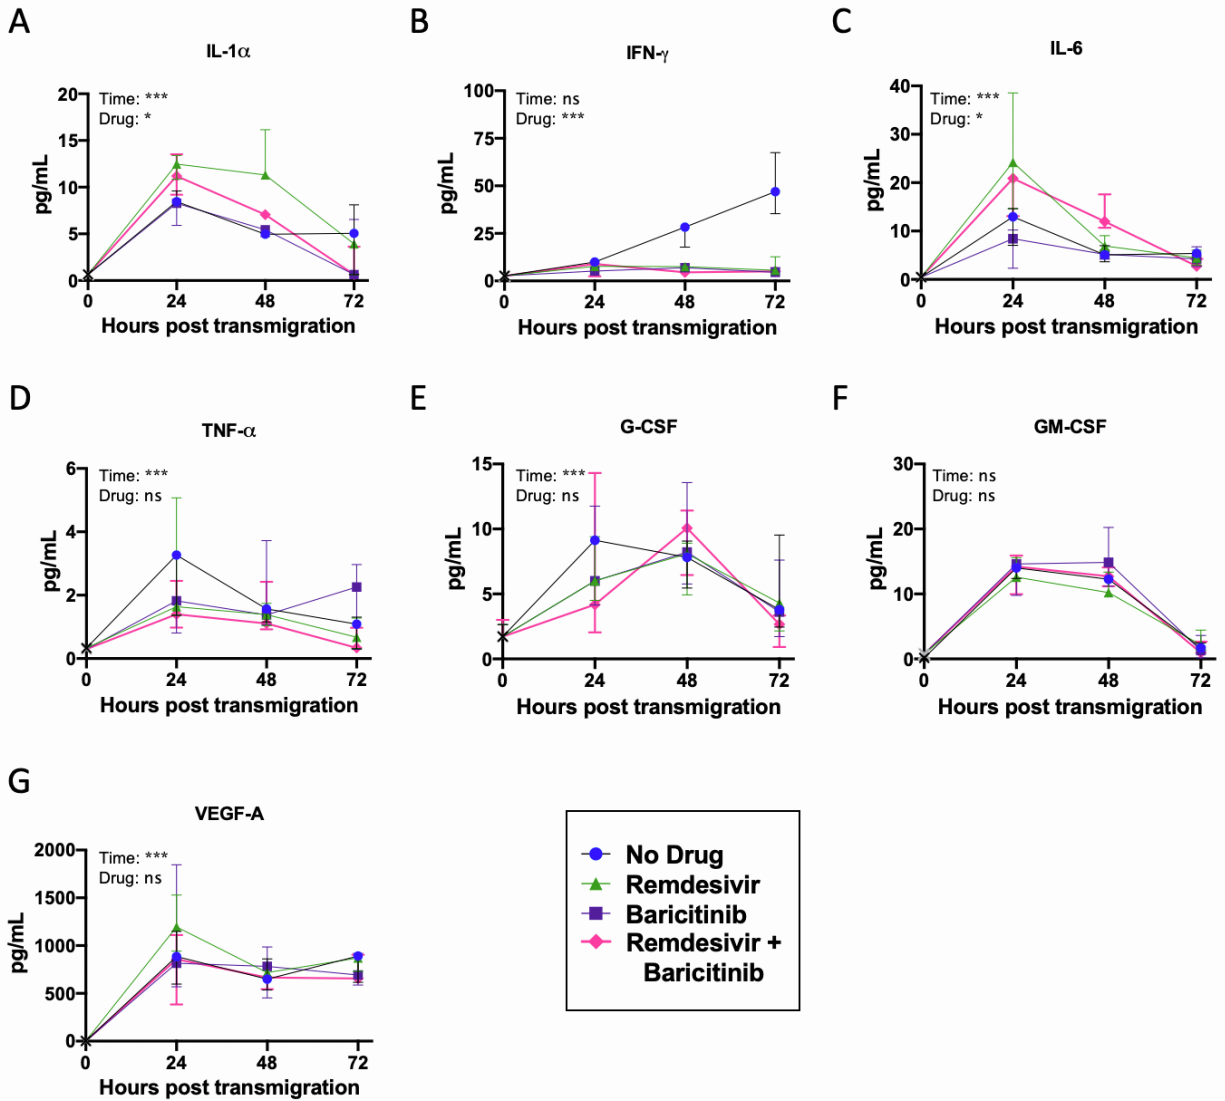

**Supplementary Figure 11. Related to Figure 6.** Inflammatory mediators from each of the monocyte treatment conditions were quantified using an electrochemiluminescent assay from n=3 biological replicates. All statistics were calculated with a two-way ANOVA, main effects model in Prism with Geisser-Greenhouse correction applied. \* p<0.05, \*\* p<0.01, \*\*\*p<0.001. Shown are median and interquartile range.
